# Supplementary material
Source: PubMed Central journal article supplement (PMC6708327)
Supplement: pnas.1902623116.sapp.pdf [file pnas.1902623116.sapp.pdf]

## SUPPLEMENTARY INFORMATION

### **Molecular mimicry between Anoctamin 2 and Epstein-Barr virus nuclear antigen 1 associates with multiple sclerosis risk**

Katarina Tengvall<sup>1,2</sup>, Jesse Huang<sup>1,2</sup>, Cecilia Hellström<sup>3</sup>, Patrick Kammer<sup>4</sup>, Martin Biström<sup>5</sup>, Burcu Ayoglu<sup>6</sup>, Izaura Lima Bomfim<sup>1,2</sup>, Pernilla Stridh<sup>1,2</sup>, Julia Butt<sup>4</sup>, Nicole Brenner<sup>4</sup>, Angelika Michel<sup>4</sup>, Karin Lundberg<sup>2,7</sup>, Leonid Padyukov<sup>2,7</sup>, Ingrid E. Lundberg<sup>2,7</sup>, Elisabet Svenungsson<sup>7</sup>, Ingemar Ernberg<sup>8</sup>, Sigurgeir Olafsson<sup>9</sup>, Alexander Dilthey<sup>10,11</sup>, Jan Hillert<sup>1</sup>, Lars Alfredsson<sup>12,13</sup>, Peter Sundström<sup>5</sup>, Peter Nilsson<sup>3\*</sup>, Tim Waterboer<sup>4\*</sup>, Tomas Olsson<sup>1,2\*</sup>, Ingrid Kockum<sup>1,2\*</sup>.

\*shared author

<sup>1</sup> Neuroimmunology Unit, The Karolinska Neuroimmunology & Multiple Sclerosis Centre, Department of Clinical Neuroscience, Karolinska Institute, Stockholm, Sweden

<sup>2</sup> Centrum for Molecular Medicine, Karolinska University Hospital, Stockholm, Sweden

<sup>3</sup> Division of Affinity Proteomics, Department of Protein Science, KTH Royal Institute of Technology & SciLifeLab, Stockholm, Sweden

<sup>4</sup> Infections and Cancer Epidemiology, Infection, Inflammation and Cancer Research Program, German Cancer Research Center (DKFZ), Heidelberg, Germany

<sup>5</sup> Department of Pharmacology and Clinical Neuroscience, Umeå University, Umeå, Sweden

<sup>6</sup> Division of Cellular and Clinical Proteomics, Department of Protein Sciences, KTH Royal Institute of Technology & SciLifeLab, Stockholm, Sweden

<sup>7</sup> Division of Rheumatology, Department of Medicine Solna, Karolinska Institutet, Stockholm, Sweden

<sup>8</sup> Department of Microbiology, Tumor and Cell Biology, Karolinska Institute, Stockholm, Sweden

<sup>9</sup> deCODE genetics/Amgen, Reykjavik, Iceland.

<sup>10</sup> Wellcome Trust Centre for Human Genetics, University of Oxford, Oxford, United Kingdom.

<sup>11</sup> Institute of Medical Microbiology and Hospital Hygiene, Heinrich-Heine-University Düsseldorf, Germany

<sup>12</sup> Institute of Environmental Medicine, Karolinska Institute, Stockholm, Sweden;

<sup>13</sup> Centre for Occupational and Environmental Medicine, Stockholm County Council, Stockholm, Sweden

## Abbreviations

**aa** amino acid/s; **ANO2** Anoctamin 2; **AP** attributable proportion; **CAC** continuous association curve; **CIS** clinically isolated syndrome; **CNS** central nervous system; **CSF** Cerebrospinal fluid; **EBNA1** Epstein-Barr virus nuclear antigen 1; **EBV** Epstein-Barr virus; **GWAS** genome wide association study; **HLA** human leukocyte antigen; **IgG** immunoglobulin G; **IM** infectious mononucleosis; **IIM** idiopathic inflammatory myopathy; **LD** linkage disequilibrium; **MADs** median absolute deviations; **MFI** median fluorescence intensity; **MHC** major histocompatibility complex; **MS** multiple sclerosis; **OR** odds ratio; **PC** principal component; **RA** rheumatoid arthritis; **SLE** systemic lupus erythematosus; **SNP** single nucleotide polymorphism; **95%CI** ninety-five percent confidence interval

## TABLE OF CONTENTS

|                                                                                                           |    |
|-----------------------------------------------------------------------------------------------------------|----|
| ABBREVIATIONS .....                                                                                       | 2  |
| MATERIAL S1. GENOTYPING QUALITY CONTROL AND ANALYSES .....                                                | 3  |
| <i>Genome-wide association analyses</i> .....                                                             | 3  |
| <i>HLA genotyping and association analyses</i> .....                                                      | 4  |
| MATERIAL S2. DESCRIPTION OF COHORTS .....                                                                 | 4  |
| MATERIAL S3. DESCRIPTION OF SEROLOGICAL MEASUREMENTS.....                                                 | 5  |
| MATERIAL S4. DESCRIPTION FOR ANO2 AND EBNA1 CROSS REACTIVITY .....                                        | 6  |
| <i>ANO2 autoantibody epitope mapping</i> .....                                                            | 6  |
| <i>Sequence alignment of ANO2 and EBNA1</i> .....                                                         | 6  |
| <i>Pilot experiments for cross reactivity</i> .....                                                       | 6  |
| <i>Follow-up experiments for cross reactivity in a larger sample set</i> .....                            | 7  |
| MATERIAL S5. BATCH CORRECTION AND THRESHOLD DEFINITIONS .....                                             | 7  |
| MATERIAL S6: STATISTICAL ANALYSES.....                                                                    | 8  |
| FIGURE S1. ANO2 EPITOPE MAPPING AND PROTEIN FRAGMENT COMPETITION. ....                                    | 10 |
| FIGURE S2. GENOME-WIDE ASSOCIATION ANALYSES OF ANTI-ANO2 ANTIBODY LEVELS.....                             | 11 |
| FIGURE S3. CORRELATION OF ANTI-ANO2 INTENSITY VALUES BETWEEN ASSAYS AND REPRESENTATIONS. ....             | 12 |
| FIGURE S4. MULTIDIMENSIONAL SCALING PLOTS USING ANCESTRY INFORMATIVE MARKERS .....                        | 13 |
| FIGURE S5. HIGH CORRELATION BETWEEN ANO2 ANTIBODY REACTIVITY IN CEREBROSPINAL FLUID AND PLASMA. ....      | 14 |
| FIGURE S6. CORRELATION BETWEEN ANO2 AND EBNA1 ANTIBODY REACTIVITY IN CEREBROSPINAL FLUID AND PLASMA. .... | 15 |
| TABLE S1. ASSOCIATION OF ANTI-ANO2 ANTIBODY LEVELS WITH DISEASE. ....                                     | 16 |
| TABLE S2. ANO2 SEROPOSITIVITY ASSOCIATION WITH MULTIPLE SCLEROSIS AT DIFFERENT CUTOFFS. ....              | 17 |
| TABLE S3. ODDS RATIOS FOR MULTIPLE SCLEROSIS WITH DIFFERENT COMBINATIONS OF THE RISK FACTORS .....        | 18 |
| TABLE S4. TOP SNPs ( $p < 10^{-4}$ ) FROM GWAS USING THE OMNIEXPRESS CHIP .....                           | 19 |
| TABLE S5. HLA ALLELES ASSOCIATED WITH ANTI-ANO2 ANTIBODY LEVELS .....                                     | 25 |
| TABLE S6. ANO2 [AA 1-365] AUTOANTIBODY REACTIVITY ASSOCIATION WITH DISEASE. ....                          | 26 |
| TABLE S7. DEMOGRAPHIC DATA OF THE INITIAL, VALIDATION, AND WHOLE COHORTS. ....                            | 27 |
| REFERENCES.....                                                                                           | 28 |

## Material S1. Genotyping quality control and analyses

Genotyping was carried out at deCODE (1) using Illumina OmniExpress chip with 716 503 SNPs mapped to the Human Assembly Feb.2009 (GRCh37/hg19). We excluded SNPs with less than 2% frequency in the population, less than 98% genotyping rate and SNPs that were not in Hardy-Weinberg equilibrium ( $p < 0.0001$ ). After quality control, 615 763 SNPs (86%) remained.

From 13781 genotyped individuals, the following were excluded; 1 individual with more than 2% missing genotypes, 71 individuals with high heterozygosity rates ( $> 0.032$ ), 127 individuals with discordant sex information, 344 individuals who were ancestral outliers ( $Z = 6$  SD), and 311 individuals were closely related (IBD  $\pi$ -hat 0.175). This left 12 778 individuals (6 983 multiple sclerosis (MS) cases, 5 795 controls) remaining that passed quality control. Out of these, we also had serological data for 11 936 individuals, which was used in the genome wide association study (GWAS).

Genotypes from 331 537 SNPs were available from another genotyping array, the MS replication chip, through collaboration with the International Multiple Sclerosis Genetics Consortium (IMSGC). The MS replication chip is a custom content array that includes rare variants ( $< 2\%$  MAF) that we excluded from this analysis (2), and 94 598 SNPs remained after quality control (MAF  $> 2\%$ ,  $< 98\%$  genotyping success rate, and HWE  $p < 0.0001$ ). From 16381 (4210 males, 12 132 females, 39 ambiguous) genotyped individuals, the following were excluded; 27 individuals with high heterozygosity rates ( $> 0.0769$ ), 309 individuals with discordant sex information, 637 individuals were population outliers ( $Z = 6$  SD), and 461 individuals were closely related (IBD  $\pi$ -hat 0.175). In total, 13160 individuals also had serology data and were included in subsequent analyses. In GWAS using OmniExpress SNPs when adjusting for HLA-alleles, *i.e.* using HLA alleles imputed from the MS replication chip, the number of individuals was 11 069.

### Genome-wide association analyses

Genome wide association analyses of anti-ANO2 antibody levels was performed in individuals from the Whole cohort, which was previously genotyped both at deCODE Genetics (1) using Illumina OmniExpress chip and through a collaboration with the International MS Genetics Consortium (IMSGC) using the MS replication chip. Ancestrally informative markers (AIM) were included on the MS replication chip to enable estimates of population stratification ( $n = 3 736$ ). Of these, 2 307 AIM were also available from the OmniExpress chip, and used in the quality control. Based on the selected AIM markers, a relationship matrix was generated and plotted as multi-dimensional scaling plot showing that the visualized population substructure was explained by self-reported origin of the subjects and not by ANO2-seropositivity, MS-status, or study cohort (**Fig. S3**). MS-status, age, sex, EBNA1-serostatus, study type, and principal components (PCs) to correct for population stratification, were included as fixed covariates in all GWAS's. PCs 1-5 (OmniExpress) and PCs 1-6 (MS replication chip) were calculated using Smart-PCA (3).

Genome-wide association data analyses were performed with PLINK v. 1.90 (4) and in R v. 3.3.3 with R-studio (v. 1.1.442) using the R-package GenABEL v. 1.8-0 (5) and hglm v. 1.0-0

(6). The R-package *cgmisc* v. 2.0 (7) was used for visualization and defining SNPs in linkage disequilibrium (LD) where the threshold for LD was set at  $r^2 > 0.6$ . Genome-wide significance threshold was set at the generally accepted level of  $P = 5 \times 10^{-8}$  (8).

### **HLA genotyping and association analyses**

Genotypes from the MS replication chip (2, 9) after quality control of SNPs and individuals were used for imputation of HLA allele variants for MHC class I and II using the software *HLA\*IMP:02* (10) and an extended reference panel (including a Swedish cohort for HLA class II). After removal of population outliers, 282 HLA alleles, spread over 11 loci, were available for 7 062 MS cases and 6 098 controls with serology data. We tested each HLA allele in turn for association with anti-EBNA1 and log<sub>10</sub> transformed anti-ANO2 antibody levels using logistic regression where carrier status was treated as a binary variable. The HLA allele association analyses were corrected for MS, sex, age, study type, EBNA1-status (except in the EBNA1-association analysis), and six PCs (from MS replication chip data). The same alleles were the most associated ones without adjusting for EBNA1-status as well as when the analysis was rerun in 11 805 individuals excluding persons with imputation quality score below 0.7 at either allele in the DRB1 locus. The reason for not removing individuals with bad quality alleles before the association analysis was to avoid bias favoring high frequency alleles over low frequency alleles, which generally have a lower quality score. For the RA sample cohort HLA alleles were imputed using *SNPtoHLA* (11) and available for 1 214 individuals.

### **Material S2. Description of cohorts**

Plasma samples were included from case-control cohorts consisting of 8 746 MS cases and 7 228 controls (after removal of missing data, i.e., individuals lacking phenotype information or sample measurement, **Table S7**). They were recruited from three Swedish nation-wide epidemiological studies and one clinical based study: EIMS (12), GEMS (13), IMSE (14), and STOP-MS (15). All patients were examined and diagnosed by a neurologist and fulfilled the McDonald criteria (16, 17). The patients recruited to the EIMS and STOP-MS study cohorts were incident cases whereas those in GEMS and IMSE were prevalence-based. Differences in, e.g., disease duration, age at sampling, and disease severity, were considered in the analyses by adjusting for study type (*i.e.* incidence versus prevalence) and age at sampling (in years). Controls were randomly selected from a national population registry and matched with patients in the EIMS and GEMS studies by residential area, sex, and age (within predetermined 5-year age groups). Controls were not available from IMSE or STOP-MS. The study subjects also had records of self-reported birth country (Sweden, other Scandinavian countries, Finland, other, or unknown) for both the subjects and their parents where the record of country ethnically furthest away from Sweden was the one used. In the analysis in this study patients and controls were divided into the following three sample sets for the analyses: **Whole cohort**, including all individuals; **Initial cohort**, the same individuals as our previous study (18); and **Validation cohort**, a replication sample set with all individuals except those included in our previous work (18, 19).

In additional, a **Pre-MS cohort** consisting of a prospective case-control study on biobank samples drawn before symptom onset was included. Swedish multiple sclerosis registry

containing 11 196 MS cases (February 2012) was cross-linked with three Swedish microbiological biobanks containing the remainders of sera (stored at  $-20^{\circ}\text{C}$ ) after clinical microbiological analyses performed at the University Hospitals of Skåne and Gothenburg, and the Public Health Agency of Sweden. Median and mean age at sampling was 25 years (range 2-39). Individuals who did not develop MS served as controls and were matched to cases by biobank, sex, date of sampling, and date of birth. The final number of matched sets of cases and controls were 474 and the mean difference in age at sampling was 65 days and six days for date of serum collection between cases and controls. For six individuals there were no matching case or control due to dropout of study participants after the matching process, but these individuals were still included in the analyses. In total, 478 MS cases and 476 controls were included in the analyses of the Pre-MS cohort.

Sample sets of other inflammatory diseases consisted of: an RA cohort, 986 newly diagnosed rheumatoid arthritis (RA) patients and 689 controls, from the Swedish population-based RA case-control study EIRA (20); an IIM cohort, 219 patients with idiopathic inflammatory myopathy (IIM) (21); and an SLE cohort, 349 patients with systemic lupus erythematosus (SLE) and 306 age and sex matched population controls (22). The SLE-matched controls were also used in the analyses of the IIM cohort.

### **Material S3. Description of serological measurements**

Pseudonymized plasma samples (Initial, Validation, Whole, Pre-MS and RA cohorts) were shipped on dry ice to the German Cancer Research Center (DKFZ; Heidelberg, Germany) for analysis by lab personnel, blinded to sample origin and case-control status, using Multiplex Serology, a fluorescent bead-based glutathione S-transferase (GST) capture immunoassay, as described previously (23). Briefly, SeroMap beads (Luminex, Austin, TX, USA) were covalently derivatized with glutathione-casein (GC). Antigens were bacterially expressed as GST-fusion proteins and in-situ affinity purified directly on GC-coupled bead sets (24). Antigen-loaded beads were mixed and simultaneously presented to plasma samples (final plasma dilution 1:1 000). Bound primary antibodies were detected using a biotinylated anti-human IgG secondary antibody (#109-065-064, Jackson ImmunoResearch, West Grove, USA). IgG antibody reactivities against ANO2-derived fragments ANO2 [aa 79-167] and ANO2-long [aa 1-365], and EBV-derived EBNA1 [aa 385-420] were determined. Incubation with streptavidin-R-phycoerythrin (Strep-PE) enabled detection and quantification of antibody reactivities on Luminex® 100/ 200 analyzers (Luminex Corp., Austin, TX, USA). Sero-reactivity against the tested antigens was expressed as the median fluorescence intensity (MFI) of at least 100 bead counts per bead set and plasma sample. The batch corrected MFI values (see details in **Material S5**) are henceforth referred to as signal intensities.

Antibody measurements in the plasma samples from the IIM and SLE cohorts were performed at SciLifeLab (Stockholm, Sweden). The samples were analyzed in three batches; the samples from patients with IIM in one, and the samples from patients with SLE and population controls age and sex matched to the SLE samples equally distributed in two. The analyses were performed as

the bead-based antigen array previously described (18), with some minor alterations. In short, a total of 358 antigens, including an ANO2 protein fragment (Human Protein Atlas) and full length EBNA1 (Abcam ab138345), were covalently coupled to color-coded magnetic beads (MagPlex, Luminex Corp., Austin, TX), and subsequently incubated with samples diluted 1:250. The MFI from R-phycoerythrin-conjugated Fc $\gamma$ -specific goat anti-human IgG F(ab')<sub>2</sub> fragment (H10104, Invitrogen) bound to captured human IgGs was acquired using a FlexMap3D instrument (Luminex Corp., Austin, TX, USA). The sample specific background adjusted MFI values for the IIM and SLE cohorts (see details in **Material S5**) are henceforth referred to as signal intensities.

## **Material S4. Description for ANO2 and EBNA1 cross reactivity**

### **ANO2 autoantibody epitope mapping**

Epitope mapping of ANO2 was performed to fine-tune previous work (18) by using 15 N-terminally biotinylated 15-mer peptides with 14 amino-acids overlap covering region [aa 128-156]. A set overlapping with the samples used for epitope mapping previously (18) (196 MS cases and 185 controls from the Initial cohort) as well as an additional sample set (189 MS cases and 195 controls from the Initial cohort) were analyzed. The assay was performed as previously described (18) with the addition of a fixating step using 0.2% paraformaldehyde, before incubation with the detection antibody (Invitrogen H10104).

### **Sequence alignment of ANO2 and EBNA1**

Basic Local Alignment Search Tool (BLAST; <https://blast.ncbi.nlm.nih.gov/Blast.cgi>) was used for detection of similarities between the ANO2 and EBNA1 full-length protein sequences, to investigate possible regions of cross-reactivity.

### **Pilot experiments for cross reactivity**

Initial competition assays between various EBNA1 and ANO2 representations and the corresponding antibodies were performed at SciLifeLab (Stockholm, Sweden) to test for cross reactivity. Two bead arrays were prepared according to previously described protocol (18). The first array consisted of in-house protein fragments representing ANO2 (Human Protein Atlas, HPRR3070036 [aa 79-167]) and 36 other proteins (Human Protein Atlas, 35 fragments, 27-145 aa in length), selected based on previously generated data (18). The second array consisted of ten N-terminally biotinylated peptides (Sigma-Aldrich PEPscreen) representing EBNA1 [aa 69-88, 101-120, 122-141, 385-404, 391-410, 393-412, 401-420, 421-440, 425-444, 431-450, 436-455] (**Fig. 2B**) and two representing ANO2 [aa 128-142, 135-149] (**Fig. S1A**) defined as non-reactive and reactive, respectively, in the described ANO2 autoantibody epitope mapping (**Fig. S1B**).

Seven plasma samples from MS patients, ranging between high and low anti-ANO2 and anti-EBNA1 signal intensities in our previous screening (18), were diluted 1:150 in assay buffer adapted to the protein fragment assay (0.05% PBS-Tween20, 3% BSA, 5% low-fat milk, and 160  $\mu$ g/ml His<sub>6</sub>ABP) and the peptide assay (0.05% PBS-Tween20, 3% BSA, and 10  $\mu$ g/ml

Neutravidin). Each sample was split into aliquots and individually blocked with different representations of EBNA1 and ANO2. In the first assay, four protein fragment representations of EBNA1 (Abcam ab138345 [aa 1-641], Abcam ab68991 [aa 1-90, 408-498], ProSpec ebv-276 [aa 408-641], and Nordic BioSite PPT-53340 [aa 1-90,408-498]) and the reactive in-house ANO2 fragment [aa 79-167] were used as blocking fragments at 1  $\mu$ M. In the second assay all 12 peptides included in the bead array were used as blocking fragments at 30  $\mu$ M. Additionally, two wells per sample (duplicates) without blocking fragments were included per plate and assay. All diluted samples incubated for 1 hour at room temperature with slight shaking (80rpm) to allow potential competition before incubation with the respective bead arrays. The rest of the assays were performed as previously described (18), with the addition of a fixating step using 0.2% paraformaldehyde, before incubation with the detection antibody (Invitrogen H10104).

In each assay, the fold change was calculated by dividing the mean of the signal intensities obtained from the duplicates without blocking, by the respective signal intensities obtained with blocking. The mean fold change per analyte and blocking reagent was subsequently calculated across all seven samples and visualized as heatmaps (**Fig. 2B** and **Fig. S1D**). Wilcoxon rank-sum test was used for each peptide to test effect differences of the blocking fragments.

### **Follow-up experiments for cross reactivity in a larger sample set**

Based on the pilot experiments in a small sample set ( $n = 7$ ) and 11 peptide representations of EBNA1, one peptide for ANO2 [aa 135-149] and two peptides for EBNA1 [aa 401-420] and [aa 425-444] were selected to evaluate the cross-reactivity in a larger sample set. In total, samples from 82 MS cases were selected from the Whole cohort based on the data presented here to represent both high and low anti-ANO2 and anti-EBNA1 antibody levels (including all combinations). The peptides were coupled to beads as previously described (18). The samples were diluted 1:150 in assay buffer (0.05% PBS-Tween20, 3% BSA, and 10  $\mu$ g/ml Neutravidin) and subsequently split into four equal aliquots. Each aliquot was blocked with either one of the peptides at 30  $\mu$ M or equivalent volume of 0.05% PBS-Tween20. All diluted samples were incubated for 1 hour at room temperature with slight shaking (80rpm) to allow potential competition before incubation with the bead array. The rest of the assay was performed as in the pilot experiment, following the addition of blocking reagents.

### **Material S5. Batch correction and threshold definitions**

Serological measurements for Initial, Validation, Whole, Pre-MS, and RA cohorts were conducted in several batches. To reduce batch effects, two plates of inter batch controls ( $n \sim 180$  samples) were analyzed within each batch and used to correct variation to a single reference. Control measures were modeled using either a non-linear model (e.g., logarithmic, exponential, etc.) or standard linear model. The signal intensities presented are batch-corrected. The cutoff for ANO2-seropositivity was determined at the signal intensity of 420. Since, anti-ANO2 antibody levels were significantly increased in MS cases compared to controls and the exact cutoff for ANO2-seropositivity is not given, we set out to define at what signal intensity the maximum change in association with MS occurs (continuous association curve, CAC). In summary, a continuous association curve was created by analyzing a series of overlapping “moving” strata defined by fixed percentile ranges of anti-ANO2 signal intensity. Each ANO2 stratum (“moving”) was then analyzed in association with MS incidence in comparison to the lowest

stratum (“reference”). The association estimates by anti-ANO2 signal intensity were then plotted and modeled to determine the inflection point (i.e. point of maximum change in association with MS), which was used as a cutoff to approximate the point of biological effect. For comparison, the more generally used cutoff approaches: median plus one up to 15 standard deviations (SD) in controls, mean in controls, and quantiles cutoff (top 25% versus bottom 25% with the grey zone removed), are presented in **Table S2**.

Antibody levels against EBNA1 [aa 385-420] were dichotomized into high (EBNA1-high) and low (EBNA1-low) antibody reactivity to define an individual’s EBNA1-status as has been done previously (25). The signal intensity cutoff of 5 490 (median in controls from Whole cohort) was used in analyses of Initial, Validation, and Whole cohorts. In the Pre-MS cohort and RA-cohort, EBNA1-status was defined by the median signal intensity in controls of each dataset (4 397 and at 3 912, respectively). To define individuals who were not infected by the virus, i.e., EBNA1-seronegative, the cutoff was set at an anti-EBNA1 signal intensity below 200.

The data from the IIM and SLE cohorts was background adjusted per sample by transforming the signal intensities into the number of median absolute deviations (MADs) from the sample median, based on the signal intensities from in total 358 antigens and adjusted with +6 MADs (lowest value in the complete dataset plus one) for all intensities to avoid negative values in log<sub>10</sub> transformation. The samples were dichotomized into low and high anti-EBNA1 antibody levels based on the median among controls (MADs = 1 237).

## **Material S6: Statistical analyses**

Statistical analyses were performed using R (26). The nonparametric Wilcoxon rank-sum test was applied for statistical analysis of differences for two-group comparisons. Fisher’s exact test was used for the statistical evaluation of frequency or categorical data. Spearman’s rank correlation test (rho; a nonparametric measure of rank correlation) and Pearson’s product-moment correlation was used for defining correlation between values. Analyses were performed in the Whole cohort using continuous values of anti-ANO2 signal intensity normalized with a log<sub>10</sub> transformation, if nothing else is specified. Additive interactions were determined by the attributable proportion (AP) due to interaction, using logistic regression and 95% confidence intervals (CI), in R by utilizing published scripts (27). In the linear and logistic regression models, the analyses were adjusted for MS-status, sex, age, EBNA1-status (except when testing for association with EBNA1), and study type (incident or prevalence cases).





**Figure S1. ANO2 epitope mapping and protein fragment competition.** Alignment of EBNA1 fragments and peptides to full-length EBNA1 (A) and of ANO2 15-mer peptides and protein fragments to full length ANO2 (B). ANO2 epitope mapping was performed in two separate sample sets of both MS cases and controls from the Initial cohort, one overlapping with the sample set used in previously (18) and one additional sample set, using the 15-mer peptides (**Material S4**). Signal intensities from the epitope mapping were background adjusted by subtracting the signal intensity from the neutravidin coated negative control bead, and subsequently visualized as line plots (C). The amino acid sequence in common between most reactive peptides was considered as the reactive epitope. ANO2 [aa 135-149] (pink) was the peptide with highest overall reactivity across the datasets and therefore chosen to represent the reactive epitope of ANO2 in the competition assays (**Fig. 2B and 3**). ANO2 [aa 128-142] consistently showed a complete lack of reactivity and was therefore chosen as the corresponding negative control (**Fig. 2B**). The median fold change between blocking and not blocking with protein fragments, representing ANO2 and EBNA1 (rows), in plasma samples from seven MS cases across 36 protein fragments (columns) is presented as a heatmap (D).

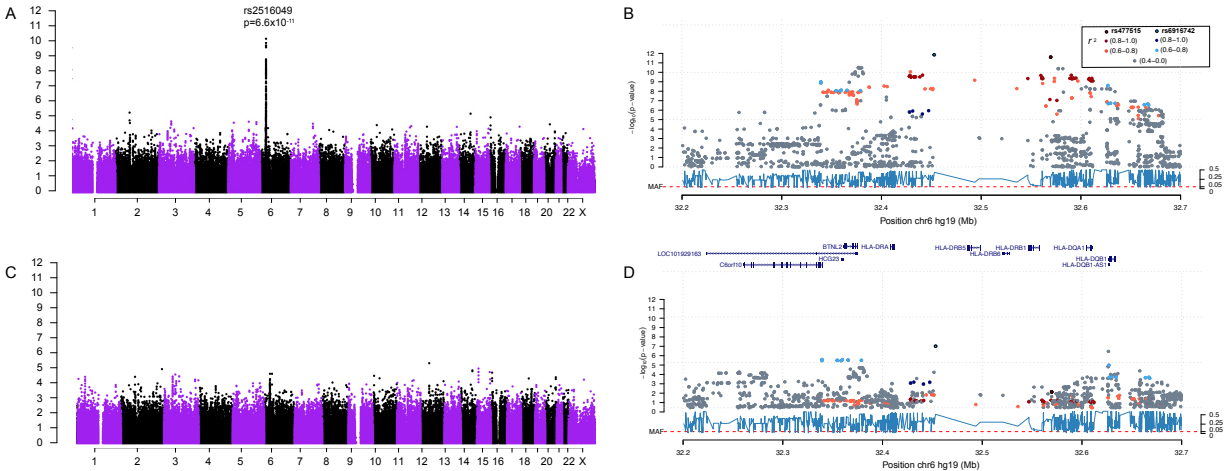

**Figure S2. Genome-wide association analyses of anti-ANO2 antibody levels.** A genome-wide significant signal was detected in the HLA gene region using OmniExpress genotype data (A and C). Genetic association analysis using MS replication chip genotype data resulted in the top associated SNP rs6916742 (blue) and the second top SNP rs477515 (red) displaying different patterns of linkage disequilibrium (LD;  $r^2$ ) with other SNPs in the HLA gene region (B and D). Association analyses were performed with  $\log_{10}$  transformed anti-ANO2 antibody levels correcting for MS, age, sex, EBNA1-status, and principal components (A-B). When conditioning for *DRB1\*04:01* and *DRB4\*01:03* there was a complete loss of association using OmniExpress genotype data (C), while using MS replication chip genotype data there was complete loss of association of rs477515 and decreased association of rs6916742 (D).

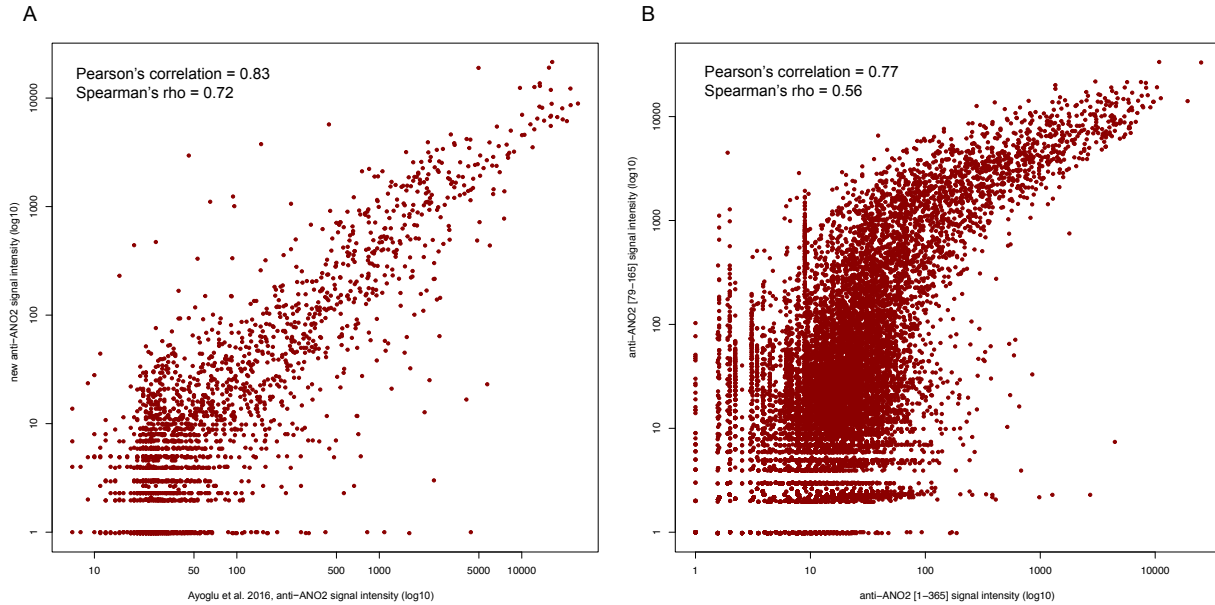

**Figure S3. Correlation of anti-ANO2 intensity values between assays and representations.** Log<sub>10</sub> transformed signal intensities from Aygolu et al., 2016 (x-axis) and corresponding intensities from the current study (y-axis) measured in the Initial cohort (A). Differences between methods were: Dilutions of plasma samples (1:150 versus 1:1 000) resulting in slightly different assay sensitivities, expression protocols, fusion tags (hexa histidine and albumin binding protein tag (His<sub>6</sub>ABP) versus GST-tag), Luminex beads (MagPlex versus SeroMap), coupling chemistries of the antigens to the beads (covalent binding of primary amines versus GST-tag binding), secondary detection reagents (PE conjugated anti human IgG antibody versus combination of biotinylated anti-human IgG and streptavidin-PE conjugate) and read-out analyzers (FlexMAP 3D versus Luminex 100/200). Log<sub>10</sub> transformed signal intensities from the current study of anti-ANO2 [aa 1-365] (x-axis) and anti-ANO2 [aa 79-167] measured in the Whole cohort (y-axis) (B).

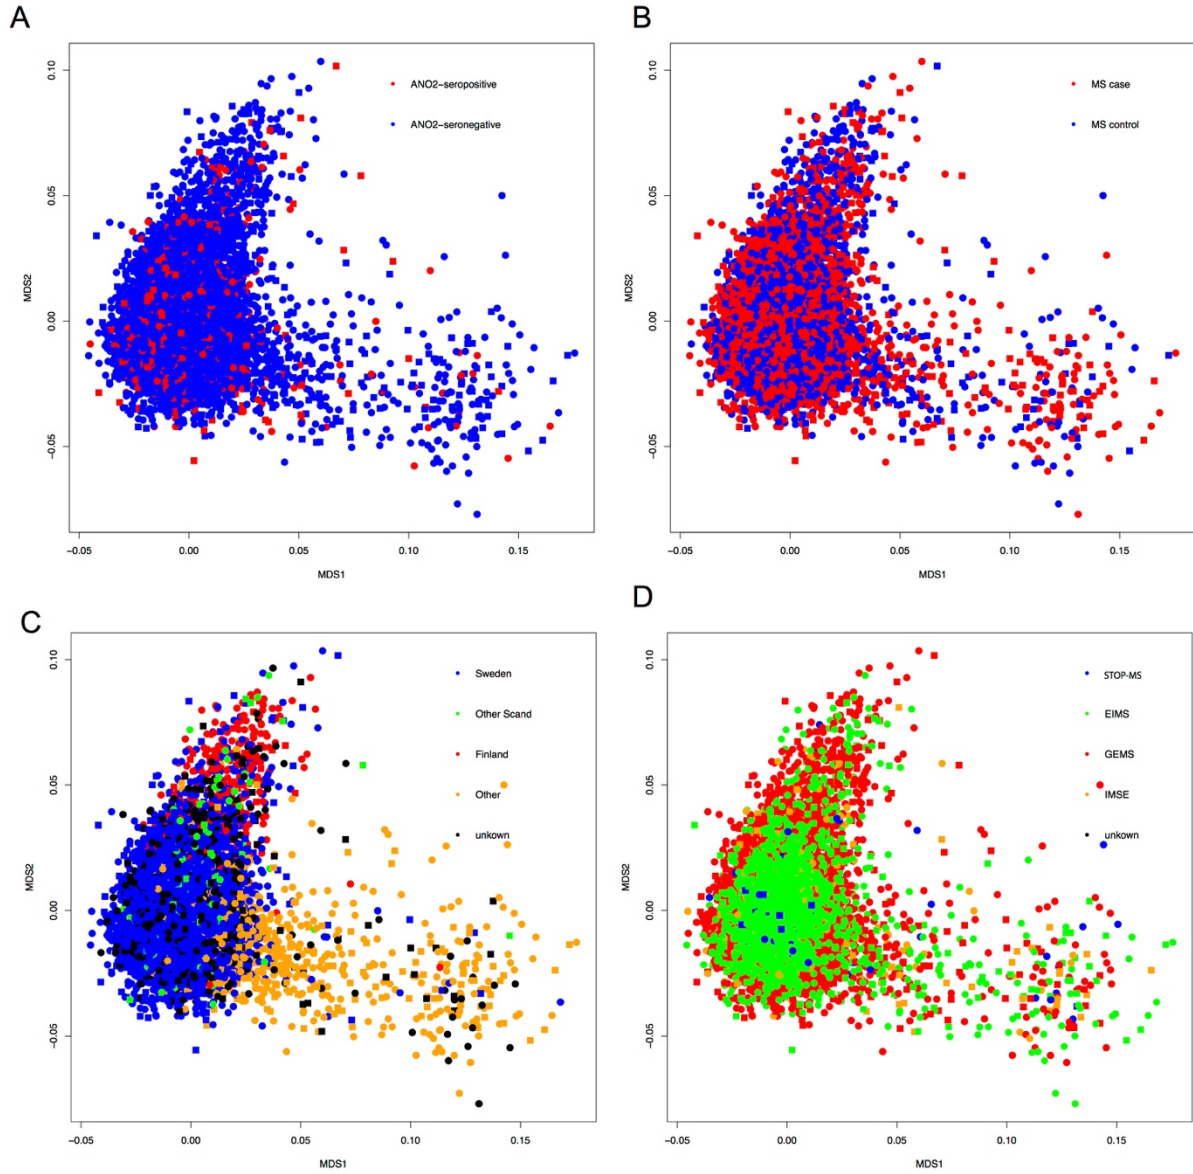

**Figure S4. Multidimensional scaling plots using ancestry informative markers (AIMs).** Colored for ANO2-seropositivity (A), MS-status (B), self-reported origin (C) and study cohort (D). Circles are females and squares are males.

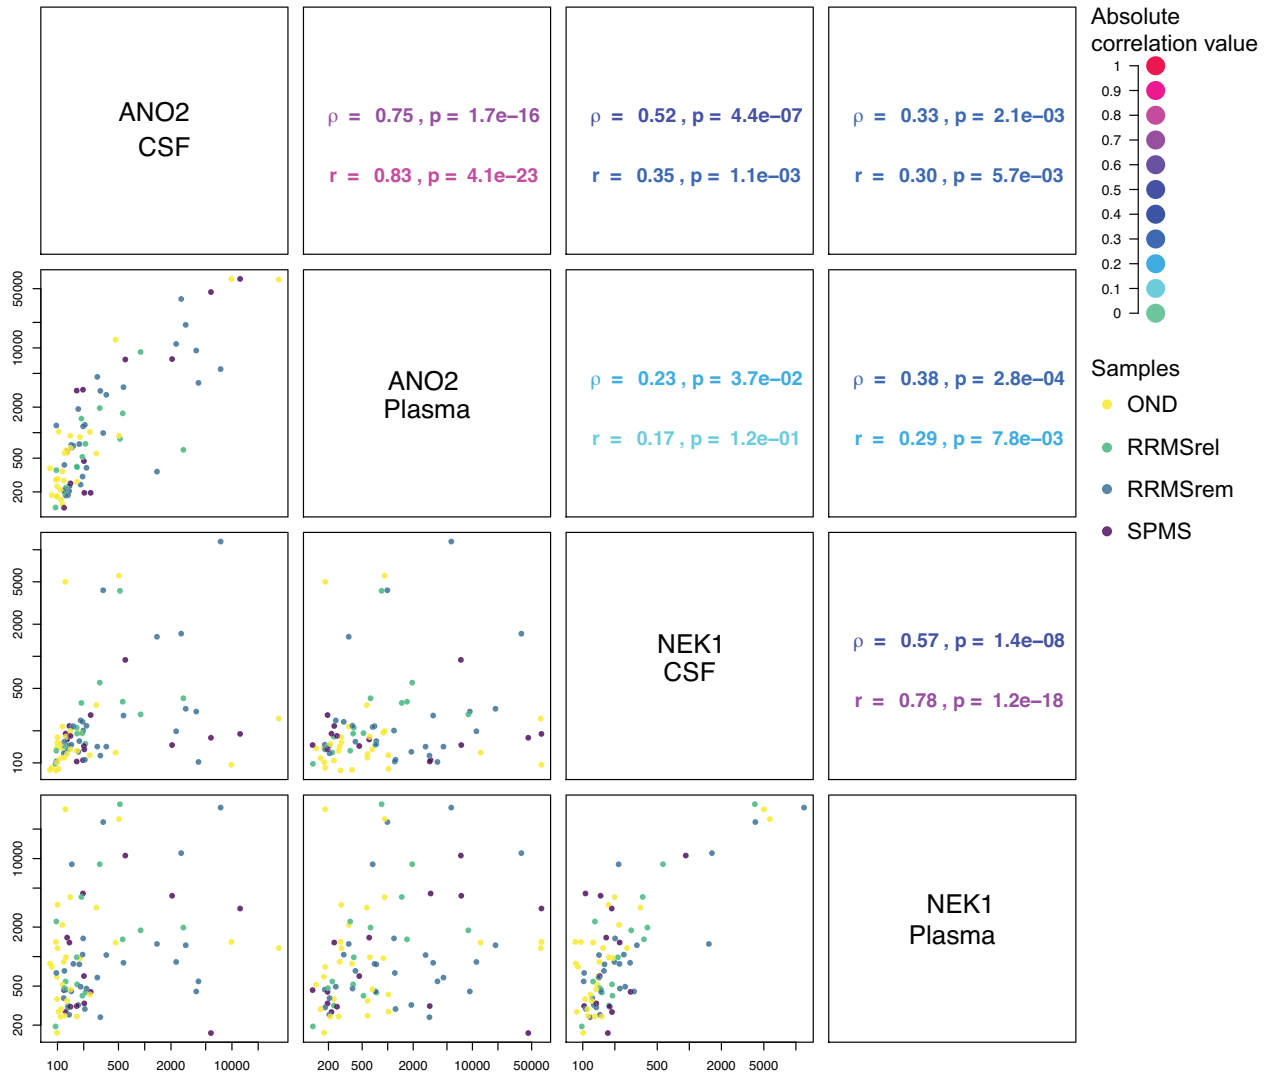

**Figure S5. High correlation between ANO2 antibody reactivity in cerebrospinal fluid and plasma.** In our first publication describing ANO2 as a potential autoantigen of relevance in MS (19), antibody reactivity was measured on a planar microarray in both cerebrospinal fluid (CSF) and plasma with high concordance. The same data is here presented as correlation plots including the signal intensities from the antigen representing NEK1, present on the same array, as reference. NEK1 was one of the most reactive antigens in CSF after ANO2 [aa 79-167] on the array and therefore selected as reference in the correlation analysis. A high correlation was seen between the sample types for each antigen but not between the antigens, suggesting that the ANO2 [aa 79-167] specific correlation between these two sample types is true. Signal intensities are represented by raw median fluorescent intensity (MFI). Samples were collected from patients with other neurological diseases (OND,  $n = 28$ ), relapsing remitting MS (RRMS) in relapsing stage (RRMSrel,  $n = 15$ ), RRMS in remitting stage (RRMSrem,  $n = 28$ ), and secondary progressive MS (SPMS,  $n = 14$ ). (For details regarding Materials and Methods see (19)). Correlation values were estimated with Pearson's correlation ( $\rho$ ) and Spearman's rho ( $r$ ).

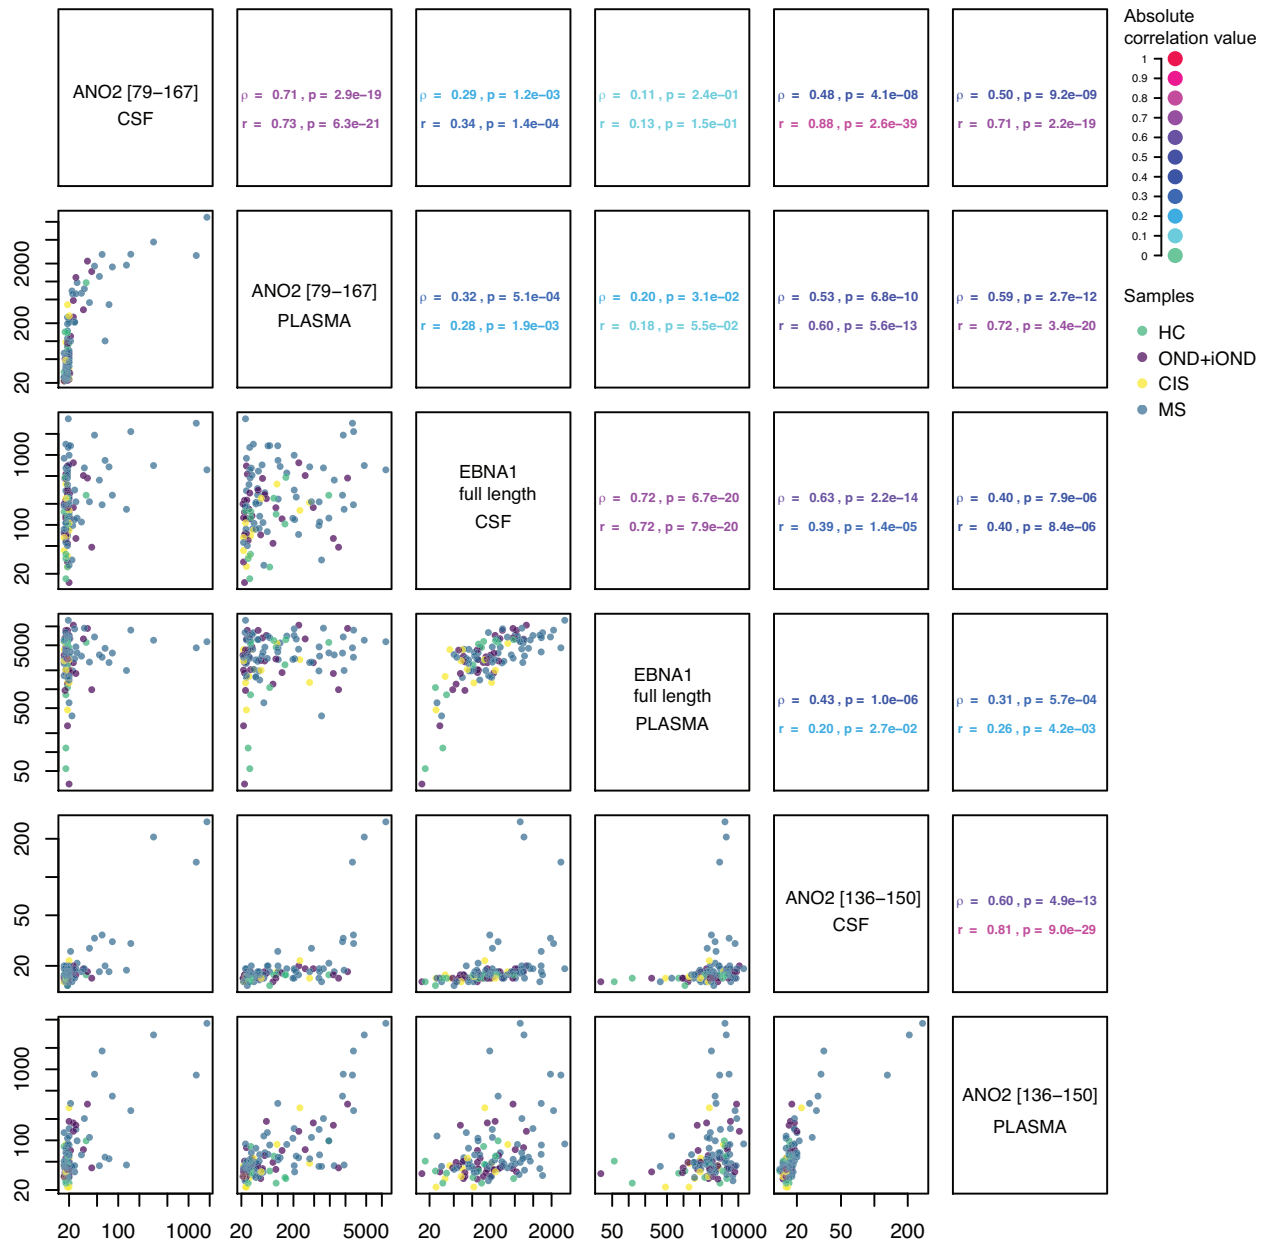

**Figure S6. Correlation between ANO2 and EBNA1 antibody reactivity in cerebrospinal fluid and plasma.** Additional to our first publication describing ANO2 as a potential autoantigen of relevance in MS (19), we here measured antibody reactivity towards both ANO2 and EBNA1 in a separate sample cohort on a multiplex bead array in matched CSF and plasma from 118 individuals. The methodology for generation of protein and peptide arrays and for analysis of plasma samples was applied as described in detail previously (18, 19). CSF samples were analyzed at a dilution rate of 1:50. The sample set consisted of a subset from the STOP-MS cohort (**Material S2**) including healthy controls (HC, n = 12), patients with other neurological diseases and other inflammatory neurological diseases (OND+iOND, n = 33), clinically isolated syndrome (CIS, n = 11), and MS (n = 62). Presented here are correlation plots

of the signal intensities, represented by raw median fluorescent intensity (MFI), in plasma and CSF from ANO2 [aa 79-167], EBNA1 full length, and ANO2 [aa 136-150] (peptide overlapping with ANO2 reactive epitope). In concordance to **Fig. S5**, a high correlation is detected between reactivity towards ANO2 [aa 79-167] in plasma and CSF. High antibody reactivity towards ANO2 is basically only detected in individuals with high antibody reactivity towards EBNA1. We also detect a high correlation between anti-EBNA1 antibody reactivity in plasma and CSF. Correlation values were estimated with Pearson's correlation ( $\rho$ ) and Spearman's rho ( $r$ ).

**Table S1. Association of anti-ANO2 antibody levels with disease.**

| Sample cohort     | Cases<br>n | Controls<br>n | beta | P                     | P (log <sub>10</sub> ) | beta* | P*                    | P (log <sub>10</sub> )* |
|-------------------|------------|---------------|------|-----------------------|------------------------|-------|-----------------------|-------------------------|
| <b>Initial</b>    | 1 040      | 1 058         | 456  | 1.1x10 <sup>-15</sup> | 5.7x10 <sup>-30</sup>  | 428   | 5.0x10 <sup>-13</sup> | 6.9x10 <sup>-21</sup>   |
| <b>Validation</b> | 7 603      | 6 170         | 251  | 1.8x10 <sup>-22</sup> | 1.3x10 <sup>-46</sup>  | 182   | 7.1x10 <sup>-12</sup> | 2.3x10 <sup>-22</sup>   |
| <b>Whole</b>      | 8 746      | 7 228         | 277  | 4.5x10 <sup>-32</sup> | 1.8x10 <sup>-69</sup>  | 213   | 4.2x10 <sup>-27</sup> | 3.5x10 <sup>-36</sup>   |
| <b>Pre-MS</b>     | 476        | 478           | 14   | 0.89                  | 1.2x10 <sup>-2</sup>   | -80   | 0.42                  | 0.23                    |
| <b>RA</b>         | 986        | 689           | 2    | 0.96                  | 0.49                   | -2    | 0.95                  | 0.38                    |
| <b>IIM</b>        | 219        | 306**         | 11   | 0.52                  | 0.46                   | 4     | 0.79                  | 0.81                    |
| <b>SLE</b>        | 349        | 306**         | -5   | 0.65                  | 0.58                   | -2    | 0.85                  | 0.36                    |

*Association analyses were adjusted for age and sex. Analyses were also adjusted for study type for the Validation and Whole cohorts.*

*\* Adjusted also for EBNA1-status; \*\* Same control set used for both IIM and SLE cohort, these controls were selected to match SLE cases*

*MS=Multiple sclerosis, RA= Rheumatoid arthritis, IIM= Idiopathic inflammatory myopathy, SLE= systemic lupus erythematosus*



**Table S2. ANO2 seropositivity association with multiple sclerosis at different cutoffs.**

| Cutoff strategy                             | Signal intensity cutoff | ANO2+ controls n (%) | ANO2+ multiple sclerosis cases n (%) | OR (95% CI)    | P                     | OR (95% CI)*   | P*                    |
|---------------------------------------------|-------------------------|----------------------|--------------------------------------|----------------|-----------------------|----------------|-----------------------|
| <b>median + 15 SD**</b>                     | 14 198                  | 3 (0.041)            | 27 (0.31)                            | 7.2 (2.5-30.3) | 1.2x10 <sup>-3</sup>  | 6.4 (2.2-27.5) | 2.7x10 <sup>-3</sup>  |
| <b>median + 10 SD**</b>                     | 9 468                   | 17 (0.24)            | 81 (0.93)                            | 3.6 (2.2-6.3)  | 2.0x10 <sup>-6</sup>  | 3.0 (1.8-5.2)  | 7.4x10 <sup>-5</sup>  |
| <b>median + 5 SD**</b>                      | 4 739                   | 62 (0.86)            | 254 (2.9)                            | 3.3 (2.5-4.4)  | 6.7x10 <sup>-17</sup> | 2.6 (2.0-3.5)  | 5.6x10 <sup>-11</sup> |
| <b>median + 3 SD**</b>                      | 2 847                   | 145 (2.0)            | 445 (5.1)                            | 2.6 (2.1-3.1)  | 3.8x10 <sup>-22</sup> | 2.1 (1.7-2.5)  | 3.5x10 <sup>-13</sup> |
| <b>median + 2 SD**</b>                      | 1 900                   | 224 (3.1)            | 608 (7.0)                            | 2.3 (2.0-2.7)  | 4.5x10 <sup>-25</sup> | 1.8 (1.6-2.2)  | 8.3x10 <sup>-14</sup> |
| <b>median + 1 SD**</b>                      | 955                     | 372 (4.5)            | 912 (10.4)                           | 2.1 (1.9-2.4)  | 4.4x10 <sup>-31</sup> | 1.7 (1.5-2.0)  | 3.3x10 <sup>-16</sup> |
| <b>Continuous association curve (CAC)</b>   | 420                     | 566 (7.8)            | 1278 (14.6)                          | 2.0 (1.8-2.2)  | 5.7x10 <sup>-38</sup> | 1.6 (1.5-1.8)  | 3.5x10 <sup>-19</sup> |
| <b>mean**</b>                               | 208                     | 793 (11.0)           | 1618 (18.5)                          | 1.8 (1.7-2.0)  | 1.5x10 <sup>-37</sup> | 1.5 (1.4-1.7)  | 2.7x10 <sup>-18</sup> |
| <b>Quartiles (top 25% vs. bottom 25%***</b> | 57                      | 1407 (40.0)          | 2584 (58.0)                          | 1.9 (1.7-2.1)  | 1.8x10 <sup>-43</sup> | 1.6 (1.5-1.8)  | 5.1x10 <sup>-22</sup> |

*Association analyses were performed in the Whole cohort and are adjusted for age, sex, and study type. \* adjusted also for EBNA1-status; \*\* in controls; \*\*\* Removal of individuals with a signal intensity between 3 and 57 resulting in 3 518 controls and 4 456 multiple sclerosis cases being included in analysis.*

**Table S3. Odds ratios for multiple sclerosis with different combinations of the risk factors**

| Multiple sclerosis cases (n) | Controls (n) | Risk factors                         | OR    | SE   | CI95_L | CI95_U | P                       |
|------------------------------|--------------|--------------------------------------|-------|------|--------|--------|-------------------------|
| 339                          | 42           | ANO2+ DRB115:01+ A02:01- EBNA1[HIGH] | 26.43 | 0.18 | 18.93  | 37.78  | 2.61x10 <sup>-77</sup>  |
| 1553                         | 401          | ANO2- DRB115:01+ A02:01- EBNA1[HIGH] | 12.32 | 0.08 | 10.50  | 14.48  | 2.65x10 <sup>-206</sup> |
| 235                          | 58           | ANO2+ DRB115:01+ A02:01+ EBNA1[HIGH] | 13.19 | 0.16 | 9.71   | 18.18  | 1.41x10 <sup>-58</sup>  |
| 1256                         | 519          | ANO2- DRB115:01+ A02:01+ EBNA1[HIGH] | 7.82  | 0.08 | 6.69   | 9.15   | 5.39x10 <sup>-146</sup> |
| 41                           | 15           | ANO2+ DRB115:01+ A02:01- EBNA1[LOW]  | 9.58  | 0.31 | 5.31   | 18.18  | 4.19x10 <sup>-13</sup>  |
| 324                          | 287          | ANO2- DRB115:01+ A02:01- EBNA1[LOW]  | 3.62  | 0.10 | 2.97   | 4.42   | 5.76x10 <sup>-37</sup>  |
| 212                          | 87           | ANO2+ DRB115:01- A02:01- EBNA1[HIGH] | 8.04  | 0.14 | 6.11   | 10.68  | 2.02x10 <sup>-48</sup>  |
| 1040                         | 812          | ANO2- DRB115:01- A02:01- EBNA1[HIGH] | 4.11  | 0.08 | 3.54   | 4.77   | 7.94x10 <sup>-77</sup>  |
| 25                           | 24           | ANO2+ DRB115:01+ A02:01+ EBNA1[LOW]  | 3.46  | 0.30 | 1.94   | 6.22   | 2.69x10 <sup>-05</sup>  |
| 350                          | 399          | ANO2- DRB115:01+ A02:01+ EBNA1[LOW]  | 2.86  | 0.10 | 2.37   | 3.45   | 3.04x10 <sup>-28</sup>  |
| 37                           | 37           | ANO2+ DRB115:01- A02:01- EBNA1[LOW]  | 3.38  | 0.24 | 2.10   | 5.45   | 5.39x10 <sup>-07</sup>  |
| 446                          | 960          | ANO2- DRB115:01- A02:01- EBNA1[LOW]  | 1.48  | 0.08 | 1.26   | 1.75   | 1.88x10 <sup>-06</sup>  |
| 108                          | 141          | ANO2+ DRB115:01- A02:01+ EBNA1[HIGH] | 2.48  | 0.14 | 1.87   | 3.27   | 2.17x10 <sup>-10</sup>  |
| 699                          | 1056         | ANO2- DRB115:01- A02:01+ EBNA1[HIGH] | 2.09  | 0.08 | 1.80   | 2.44   | 6.37x10 <sup>-22</sup>  |
| 19                           | 52           | ANO2+ DRB115:01- A02:01+ EBNA1[LOW]  | 1.16  | 0.28 | 0.66   | 1.97   | 5.92x10 <sup>-01</sup>  |
| 378                          | 1208         | ANO2- DRB115:01- A02:01+ EBNA1[LOW]  | 1     | -    | -      | -      | -                       |

**Table S4. Top SNPs ( $p < 10^{-4}$ ) from GWAS using the OmniExpress chip**

| SNP        | CHR | POS       | A1 | A2 | N     | eff A2 | se eff A2 | chi2 1df | P                      | raw-P (no covariates)  |
|------------|-----|-----------|----|----|-------|--------|-----------|----------|------------------------|------------------------|
| RS1009113  | 1   | 7143807   | G  | A  | 11929 | 0.066  | 0.016     | 16.2     | $5.75 \times 10^{-05}$ | $1.86 \times 10^{-05}$ |
| RS990276   | 2   | 78542946  | G  | A  | 11904 | 0.061  | 0.014     | 18.5     | $1.70 \times 10^{-05}$ | $1.09 \times 10^{-05}$ |
| RS9309532  | 2   | 78594007  | A  | G  | 11929 | 0.064  | 0.014     | 20.8     | $5.18 \times 10^{-06}$ | $2.65 \times 10^{-06}$ |
| RS1006154  | 2   | 80551464  | G  | A  | 11933 | 0.073  | 0.017     | 17.7     | $2.55 \times 10^{-05}$ | $2.67 \times 10^{-05}$ |
| RS2463492  | 2   | 201465718 | C  | A  | 11936 | -0.047 | 0.012     | 15.5     | $8.22 \times 10^{-05}$ | $6.68 \times 10^{-05}$ |
| RS2465665  | 2   | 201478264 | A  | G  | 11904 | -0.047 | 0.012     | 15.6     | $7.98 \times 10^{-05}$ | $6.53 \times 10^{-05}$ |
| RS12637576 | 3   | 49237334  | A  | G  | 11926 | 0.049  | 0.012     | 15.4     | $8.80 \times 10^{-05}$ | $1.07 \times 10^{-04}$ |
| RS12631989 | 3   | 49273996  | A  | G  | 11908 | 0.048  | 0.012     | 15.2     | $9.80 \times 10^{-05}$ | $1.20 \times 10^{-04}$ |
| RS4688454  | 3   | 64405996  | A  | G  | 11935 | 0.052  | 0.013     | 16.3     | $5.27 \times 10^{-05}$ | $4.36 \times 10^{-05}$ |
| RS17354320 | 3   | 69513028  | A  | C  | 11920 | 0.059  | 0.014     | 18.2     | $1.97 \times 10^{-05}$ | $1.11 \times 10^{-05}$ |
| RS9843168  | 3   | 69513198  | G  | A  | 11934 | 0.057  | 0.014     | 17.3     | $3.27 \times 10^{-05}$ | $1.73 \times 10^{-05}$ |
| RS17367084 | 3   | 69513547  | A  | G  | 11933 | 0.058  | 0.014     | 17.7     | $2.63 \times 10^{-05}$ | $1.50 \times 10^{-05}$ |
| RS9858836  | 3   | 86318521  | G  | A  | 11926 | 0.052  | 0.013     | 15.7     | $7.42 \times 10^{-05}$ | $6.34 \times 10^{-05}$ |
| RS11926519 | 3   | 86356130  | G  | A  | 11933 | 0.052  | 0.013     | 15.8     | $6.87 \times 10^{-05}$ | $6.12 \times 10^{-05}$ |
| RS9848250  | 3   | 86384224  | A  | C  | 11909 | 0.051  | 0.013     | 15.3     | $9.27 \times 10^{-05}$ | $8.89 \times 10^{-05}$ |
| RS13082563 | 3   | 195057001 | G  | A  | 11924 | 0.068  | 0.017     | 16.2     | $5.56 \times 10^{-05}$ | $3.74 \times 10^{-05}$ |
| RS1038591  | 5   | 22670144  | G  | A  | 11933 | 0.050  | 0.013     | 15.6     | $7.80 \times 10^{-05}$ | $1.58 \times 10^{-05}$ |
| RS6860776  | 5   | 22699592  | A  | G  | 11927 | 0.049  | 0.013     | 15.3     | $9.05 \times 10^{-05}$ | $2.42 \times 10^{-05}$ |
| RS6863125  | 5   | 31806258  | G  | A  | 11933 | -0.064 | 0.015     | 17.8     | $2.44 \times 10^{-05}$ | $1.20 \times 10^{-05}$ |
| RS4607382  | 5   | 116208147 | G  | A  | 11901 | 0.048  | 0.012     | 15.4     | $8.55 \times 10^{-05}$ | $7.40 \times 10^{-05}$ |
| RS6859942  | 5   | 116211296 | G  | A  | 11865 | 0.051  | 0.012     | 18.1     | $2.08 \times 10^{-05}$ | $1.85 \times 10^{-05}$ |
| RS1972623  | 5   | 116222219 | A  | G  | 11934 | 0.051  | 0.013     | 15.8     | $7.07 \times 10^{-05}$ | $6.84 \times 10^{-05}$ |
| RS6889446  | 5   | 158901965 | A  | G  | 11924 | 0.060  | 0.014     | 17.4     | $3.00 \times 10^{-05}$ | $3.14 \times 10^{-05}$ |
| RS10515797 | 5   | 158915287 | G  | A  | 11932 | 0.071  | 0.017     | 18.0     | $2.22 \times 10^{-05}$ | $1.44 \times 10^{-05}$ |
| RS2735052  | 6   | 29701564  | G  | A  | 11934 | -0.048 | 0.012     | 15.6     | $7.77 \times 10^{-05}$ | $1.59 \times 10^{-05}$ |
| RS2523395  | 6   | 29702510  | G  | A  | 11933 | -0.048 | 0.012     | 16.2     | $5.78 \times 10^{-05}$ | $1.14 \times 10^{-05}$ |
| RS2394160  | 6   | 29703262  | A  | G  | 11927 | -0.048 | 0.012     | 15.7     | $7.34 \times 10^{-05}$ | $1.51 \times 10^{-05}$ |
| RS2844831  | 6   | 29706277  | A  | G  | 11927 | -0.048 | 0.012     | 16.3     | $5.55 \times 10^{-05}$ | $1.08 \times 10^{-05}$ |
| RS2743951  | 6   | 29709234  | G  | A  | 11923 | -0.048 | 0.012     | 15.6     | $7.79 \times 10^{-05}$ | $1.46 \times 10^{-05}$ |
| RS2524084  | 6   | 31241639  | A  | G  | 11934 | -0.048 | 0.012     | 15.4     | $8.76 \times 10^{-05}$ | $2.64 \times 10^{-06}$ |
| RS2523627  | 6   | 31346445  | A  | C  | 11917 | 0.050  | 0.012     | 16.5     | $4.75 \times 10^{-05}$ | $8.80 \times 10^{-06}$ |
| RS2857600  | 6   | 31582287  | G  | A  | 11933 | 0.061  | 0.015     | 17.2     | $3.31 \times 10^{-05}$ | $7.07 \times 10^{-07}$ |
| RS2736177  | 6   | 31586094  | A  | G  | 11934 | 0.059  | 0.015     | 16.1     | $5.87 \times 10^{-05}$ | $1.35 \times 10^{-06}$ |
| RS3130071  | 6   | 31594628  | T  | A  | 11876 | 0.063  | 0.015     | 18.5     | $1.67 \times 10^{-05}$ | $3.62 \times 10^{-07}$ |
| RS1046080  | 6   | 31595882  | A  | C  | 11930 | 0.056  | 0.013     | 19.2     | $1.19 \times 10^{-05}$ | $2.84 \times 10^{-07}$ |
| RS2272593  | 6   | 31601344  | G  | A  | 11915 | 0.057  | 0.013     | 19.5     | $1.00 \times 10^{-05}$ | $2.28 \times 10^{-07}$ |
| RS3132453  | 6   | 31604044  | C  | A  | 11931 | 0.083  | 0.019     | 19.0     | $1.28 \times 10^{-05}$ | $3.65 \times 10^{-07}$ |

|            |   |          |   |   |       |        |       |      |                        |                        |
|------------|---|----------|---|---|-------|--------|-------|------|------------------------|------------------------|
| RS3130050  | 6 | 31618761 | A | G | 11923 | 0.063  | 0.015 | 18.7 | 1.53x10 <sup>-05</sup> | 2.52x10 <sup>-07</sup> |
| RS3130617  | 6 | 31627523 | A | G | 11916 | 0.056  | 0.013 | 18.8 | 1.45x10 <sup>-05</sup> | 3.46x10 <sup>-07</sup> |
| RS3117578  | 6 | 31636031 | G | A | 11933 | 0.063  | 0.015 | 19.0 | 1.28x10 <sup>-05</sup> | 2.17x10 <sup>-07</sup> |
| RS3115667  | 6 | 31643399 | G | A | 11931 | 0.056  | 0.013 | 19.3 | 1.14x10 <sup>-05</sup> | 2.74x10 <sup>-07</sup> |
| RS1475865  | 6 | 31657413 | G | A | 11932 | 0.057  | 0.013 | 19.3 | 1.11x10 <sup>-05</sup> | 2.61x10 <sup>-07</sup> |
| RS3117572  | 6 | 31717692 | G | A | 11933 | 0.063  | 0.014 | 20.4 | 6.36x10 <sup>-06</sup> | 1.93x10 <sup>-07</sup> |
| RS2227956  | 6 | 31778272 | A | G | 11931 | 0.061  | 0.014 | 19.1 | 1.22x10 <sup>-05</sup> | 3.54x10 <sup>-07</sup> |
| RS9267576  | 6 | 31812038 | C | A | 11931 | 0.070  | 0.015 | 23.0 | 1.63x10 <sup>-06</sup> | 2.23x10 <sup>-08</sup> |
| RS9267577  | 6 | 31813774 | G | A | 11931 | 0.064  | 0.014 | 21.3 | 3.91x10 <sup>-06</sup> | 7.77x10 <sup>-08</sup> |
| RS9267649  | 6 | 31824828 | G | A | 11917 | 0.066  | 0.014 | 22.0 | 2.68x10 <sup>-06</sup> | 4.71x10 <sup>-08</sup> |
| RS9267658  | 6 | 31845985 | G | A | 11930 | 0.064  | 0.015 | 19.4 | 1.06x10 <sup>-05</sup> | 1.60x10 <sup>-07</sup> |
| RS28435656 | 6 | 31880637 | G | A | 11923 | 0.054  | 0.013 | 16.0 | 6.39x10 <sup>-05</sup> | 8.13x10 <sup>-07</sup> |
| RS3130683  | 6 | 31888367 | A | G | 11919 | 0.061  | 0.014 | 18.2 | 1.98x10 <sup>-05</sup> | 1.79x10 <sup>-07</sup> |
| RS1048709  | 6 | 31914935 | G | A | 11931 | 0.054  | 0.013 | 16.7 | 4.32x10 <sup>-05</sup> | 3.44x10 <sup>-07</sup> |
| RS3130287  | 6 | 32050544 | A | G | 11918 | 0.061  | 0.014 | 18.0 | 2.21x10 <sup>-05</sup> | 1.99x10 <sup>-07</sup> |
| RS3134954  | 6 | 32071893 | A | G | 11935 | 0.059  | 0.014 | 16.8 | 4.12x10 <sup>-05</sup> | 4.65x10 <sup>-07</sup> |
| RS3130342  | 6 | 32080146 | C | A | 11930 | 0.062  | 0.014 | 18.6 | 1.58x10 <sup>-05</sup> | 1.40x10 <sup>-07</sup> |
| RS3130279  | 6 | 32112626 | G | A | 11935 | 0.064  | 0.014 | 20.6 | 5.78x10 <sup>-06</sup> | 2.90x10 <sup>-08</sup> |
| RS3131283  | 6 | 32119898 | G | A | 11932 | 0.063  | 0.014 | 19.9 | 8.37x10 <sup>-06</sup> | 4.56x10 <sup>-08</sup> |
| RS3134603  | 6 | 32126002 | G | A | 11931 | 0.068  | 0.015 | 22.2 | 2.50x10 <sup>-06</sup> | 1.71x10 <sup>-08</sup> |
| RS3130283  | 6 | 32138545 | C | A | 11817 | 0.061  | 0.014 | 18.2 | 1.98x10 <sup>-05</sup> | 1.35x10 <sup>-07</sup> |
| RS3134943  | 6 | 32147761 | G | A | 11933 | 0.062  | 0.014 | 19.6 | 9.71x10 <sup>-06</sup> | 5.82x10 <sup>-08</sup> |
| RS1800684  | 6 | 32151994 | A | T | 11931 | 0.063  | 0.014 | 19.9 | 8.18x10 <sup>-06</sup> | 4.30x10 <sup>-08</sup> |
| RS3132940  | 6 | 32161396 | C | A | 11928 | 0.066  | 0.014 | 21.5 | 3.48x10 <sup>-06</sup> | 1.47x10 <sup>-08</sup> |
| RS3132946  | 6 | 32190028 | G | A | 11933 | 0.067  | 0.014 | 22.3 | 2.31x10 <sup>-06</sup> | 8.14x10 <sup>-09</sup> |
| RS915894   | 6 | 32190390 | A | C | 11930 | -0.052 | 0.013 | 16.7 | 4.27x10 <sup>-05</sup> | 3.52x10 <sup>-08</sup> |
| RS2267644  | 6 | 32192560 | G | A | 11915 | -0.114 | 0.028 | 16.8 | 4.18x10 <sup>-05</sup> | 1.16x10 <sup>-04</sup> |
| RS9268199  | 6 | 32278635 | A | G | 11928 | 0.055  | 0.013 | 18.0 | 2.22x10 <sup>-05</sup> | 3.09x10 <sup>-08</sup> |
| RS6910071  | 6 | 32282854 | A | G | 11930 | -0.076 | 0.015 | 25.9 | 3.69x10 <sup>-07</sup> | 6.85x10 <sup>-09</sup> |
| RS2273017  | 6 | 32337630 | A | G | 11934 | 0.052  | 0.012 | 18.7 | 1.57x10 <sup>-05</sup> | 3.87x10 <sup>-08</sup> |
| RS2073044  | 6 | 32338986 | G | A | 11934 | -0.078 | 0.014 | 29.9 | 4.48x10 <sup>-08</sup> | 6.49x10 <sup>-10</sup> |
| RS2076536  | 6 | 32339348 | A | G | 11894 | 0.067  | 0.012 | 30.8 | 2.82x10 <sup>-08</sup> | 2.41x10 <sup>-12</sup> |
| RS2073045  | 6 | 32339548 | G | A | 11927 | -0.051 | 0.013 | 16.3 | 5.29x10 <sup>-05</sup> | 4.37x10 <sup>-08</sup> |
| RS2050188  | 6 | 32339897 | A | G | 11901 | 0.070  | 0.012 | 32.8 | 1.04x10 <sup>-08</sup> | 1.51x10 <sup>-14</sup> |
| RS9268403  | 6 | 32341473 | A | G | 11932 | -0.082 | 0.014 | 32.7 | 1.07x10 <sup>-08</sup> | 1.47x10 <sup>-11</sup> |
| RS9268404  | 6 | 32341719 | G | A | 11812 | -0.082 | 0.014 | 31.7 | 1.83x10 <sup>-08</sup> | 2.95x10 <sup>-11</sup> |
| RS9268425  | 6 | 32344376 | G | A | 11932 | -0.082 | 0.014 | 32.4 | 1.23x10 <sup>-08</sup> | 1.68x10 <sup>-11</sup> |
| RS9268428  | 6 | 32344973 | C | A | 11932 | -0.082 | 0.014 | 32.7 | 1.08x10 <sup>-08</sup> | 1.46x10 <sup>-11</sup> |
| RS2894252  | 6 | 32345443 | G | A | 11927 | -0.082 | 0.014 | 32.1 | 1.50x10 <sup>-08</sup> | 2.11x10 <sup>-11</sup> |
| RS2395153  | 6 | 32345595 | G | C | 11867 | -0.067 | 0.013 | 27.4 | 1.64x10 <sup>-07</sup> | 5.75x10 <sup>-10</sup> |

|           |   |          |   |   |       |        |       |      |                        |                        |
|-----------|---|----------|---|---|-------|--------|-------|------|------------------------|------------------------|
| RS8180664 | 6 | 32347490 | G | A | 11921 | -0.082 | 0.014 | 32.5 | 1.22x10 <sup>-08</sup> | 1.68x10 <sup>-11</sup> |
| RS9268454 | 6 | 32349711 | A | G | 11928 | -0.082 | 0.014 | 32.6 | 1.12x10 <sup>-08</sup> | 1.52x10 <sup>-11</sup> |
| RS9268456 | 6 | 32349946 | C | A | 11925 | -0.082 | 0.014 | 32.5 | 1.17x10 <sup>-08</sup> | 1.75x10 <sup>-11</sup> |
| RS9268460 | 6 | 32351283 | A | G | 11928 | -0.057 | 0.012 | 21.0 | 4.70x10 <sup>-06</sup> | 7.79x10 <sup>-08</sup> |
| RS9268461 | 6 | 32351901 | C | A | 11925 | -0.082 | 0.014 | 32.1 | 1.49x10 <sup>-08</sup> | 2.19x10 <sup>-11</sup> |
| RS4424066 | 6 | 32354428 | A | G | 11926 | -0.057 | 0.012 | 21.1 | 4.34x10 <sup>-06</sup> | 7.33x10 <sup>-08</sup> |
| RS9268472 | 6 | 32355605 | G | A | 11934 | -0.056 | 0.012 | 20.9 | 4.90x10 <sup>-06</sup> | 8.51x10 <sup>-08</sup> |
| RS9268474 | 6 | 32357165 | A | G | 11928 | -0.082 | 0.014 | 32.3 | 1.31x10 <sup>-08</sup> | 1.72x10 <sup>-11</sup> |
| RS3117098 | 6 | 32358513 | A | G | 11931 | 0.063  | 0.012 | 26.2 | 3.06x10 <sup>-07</sup> | 2.98x10 <sup>-12</sup> |
| RS3817973 | 6 | 32361111 | G | A | 11926 | -0.057 | 0.012 | 21.2 | 4.23x10 <sup>-06</sup> | 6.91x10 <sup>-08</sup> |
| RS2076529 | 6 | 32363955 | A | G | 11929 | -0.057 | 0.012 | 21.1 | 4.28x10 <sup>-06</sup> | 7.54x10 <sup>-08</sup> |
| RS3129954 | 6 | 32365580 | G | A | 11929 | 0.065  | 0.012 | 27.3 | 1.73x10 <sup>-07</sup> | 1.43x10 <sup>-12</sup> |
| RS3129955 | 6 | 32365840 | G | A | 11927 | 0.065  | 0.012 | 27.3 | 1.73x10 <sup>-07</sup> | 1.49x10 <sup>-12</sup> |
| RS2294878 | 6 | 32367795 | C | A | 11936 | -0.070 | 0.012 | 33.6 | 6.81x10 <sup>-09</sup> | 3.16x10 <sup>-11</sup> |
| RS3817963 | 6 | 32368087 | A | G | 11930 | -0.081 | 0.014 | 32.1 | 1.48x10 <sup>-08</sup> | 2.38x10 <sup>-11</sup> |
| RS2076525 | 6 | 32370616 | A | G | 11920 | -0.082 | 0.014 | 31.9 | 1.59x10 <sup>-08</sup> | 2.15x10 <sup>-11</sup> |
| RS2076524 | 6 | 32370684 | A | G | 11934 | -0.082 | 0.014 | 32.6 | 1.11x10 <sup>-08</sup> | 1.51x10 <sup>-11</sup> |
| RS2076523 | 6 | 32370835 | A | G | 11931 | -0.082 | 0.013 | 40.5 | 1.99x10 <sup>-10</sup> | 5.71x10 <sup>-13</sup> |
| RS3793127 | 6 | 32371915 | G | A | 11934 | -0.082 | 0.015 | 29.5 | 5.48x10 <sup>-08</sup> | 5.78x10 <sup>-10</sup> |
| RS3806157 | 6 | 32373801 | A | C | 11853 | -0.083 | 0.013 | 41.4 | 1.25x10 <sup>-10</sup> | 3.56x10 <sup>-13</sup> |
| RS9268493 | 6 | 32375330 | G | A | 11928 | -0.075 | 0.014 | 28.4 | 1.00x10 <sup>-07</sup> | 1.34x10 <sup>-10</sup> |
| RS9268494 | 6 | 32375352 | A | C | 11933 | -0.074 | 0.014 | 28.3 | 1.03x10 <sup>-07</sup> | 1.59x10 <sup>-10</sup> |
| RS6926737 | 6 | 32375745 | G | A | 11936 | -0.073 | 0.012 | 36.5 | 1.51x10 <sup>-09</sup> | 6.52x10 <sup>-13</sup> |
| RS3763309 | 6 | 32375973 | C | A | 11930 | -0.082 | 0.015 | 29.4 | 5.94x10 <sup>-08</sup> | 6.07x10 <sup>-10</sup> |
| RS3763311 | 6 | 32376176 | G | A | 11930 | -0.075 | 0.014 | 27.8 | 1.35x10 <sup>-07</sup> | 2.69x10 <sup>-10</sup> |
| RS3763312 | 6 | 32376348 | G | A | 11816 | -0.081 | 0.015 | 28.5 | 9.50x10 <sup>-08</sup> | 1.37x10 <sup>-09</sup> |
| RS3763316 | 6 | 32376746 | G | A | 11932 | -0.081 | 0.014 | 31.8 | 1.71x10 <sup>-08</sup> | 2.53x10 <sup>-11</sup> |
| RS3763317 | 6 | 32376788 | G | A | 11929 | -0.068 | 0.012 | 31.0 | 2.55x10 <sup>-08</sup> | 1.02x10 <sup>-10</sup> |
| RS9268503 | 6 | 32377061 | G | A | 11928 | -0.071 | 0.012 | 34.9 | 3.43x10 <sup>-09</sup> | 2.01x10 <sup>-12</sup> |
| RS5007265 | 6 | 32378866 | A | C | 11927 | -0.072 | 0.012 | 36.0 | 2.02x10 <sup>-09</sup> | 9.56x10 <sup>-13</sup> |
| RS5007263 | 6 | 32378982 | A | G | 11928 | -0.072 | 0.012 | 35.6 | 2.39x10 <sup>-09</sup> | 1.20x10 <sup>-12</sup> |
| RS5007259 | 6 | 32379101 | A | G | 11936 | -0.072 | 0.012 | 36.1 | 1.85x10 <sup>-09</sup> | 8.71x10 <sup>-13</sup> |
| RS9268516 | 6 | 32379489 | G | A | 11927 | -0.081 | 0.014 | 32.2 | 1.42x10 <sup>-08</sup> | 1.88x10 <sup>-11</sup> |
| RS6932810 | 6 | 32380190 | G | A | 11921 | -0.072 | 0.012 | 35.3 | 2.76x10 <sup>-09</sup> | 1.58x10 <sup>-12</sup> |
| RS6932542 | 6 | 32380262 | A | G | 11932 | -0.072 | 0.012 | 36.2 | 1.78x10 <sup>-09</sup> | 8.34x10 <sup>-13</sup> |
| RS9268541 | 6 | 32384527 | A | G | 11922 | 0.118  | 0.029 | 16.8 | 4.23x10 <sup>-05</sup> | 4.02x10 <sup>-06</sup> |
| RS2395163 | 6 | 32387809 | A | G | 11931 | -0.084 | 0.015 | 30.9 | 2.76x10 <sup>-08</sup> | 1.94x10 <sup>-10</sup> |
| RS2395175 | 6 | 32405026 | G | A | 11925 | -0.075 | 0.016 | 22.5 | 2.13x10 <sup>-06</sup> | 3.03x10 <sup>-08</sup> |
| RS3129882 | 6 | 32409530 | A | G | 11927 | 0.047  | 0.012 | 15.5 | 8.07x10 <sup>-05</sup> | 2.69x10 <sup>-08</sup> |
| RS9268658 | 6 | 32410716 | G | A | 11934 | -0.052 | 0.013 | 16.9 | 4.02x10 <sup>-05</sup> | 2.03x10 <sup>-06</sup> |

|            |   |          |   |   |       |        |       |      |                        |                        |
|------------|---|----------|---|---|-------|--------|-------|------|------------------------|------------------------|
| RS2239804  | 6 | 32411523 | A | G | 11927 | -0.052 | 0.013 | 16.6 | 4.72x10 <sup>-05</sup> | 2.38x10 <sup>-06</sup> |
| RS2239803  | 6 | 32411833 | G | A | 11920 | -0.052 | 0.013 | 17.2 | 3.30x10 <sup>-05</sup> | 1.31x10 <sup>-06</sup> |
| RS9268831  | 6 | 32427748 | G | A | 11932 | -0.050 | 0.012 | 16.6 | 4.71x10 <sup>-05</sup> | 4.09x10 <sup>-06</sup> |
| RS6923504  | 6 | 32428186 | C | G | 11928 | 0.050  | 0.012 | 16.5 | 4.83x10 <sup>-05</sup> | 7.70x10 <sup>-09</sup> |
| RS6903608  | 6 | 32428285 | A | G | 11933 | 0.051  | 0.012 | 16.7 | 4.45x10 <sup>-05</sup> | 6.57x10 <sup>-09</sup> |
| RS9268853  | 6 | 32429643 | A | G | 11914 | -0.082 | 0.014 | 34.5 | 4.16x10 <sup>-09</sup> | 1.21x10 <sup>-12</sup> |
| RS9268877  | 6 | 32431147 | G | A | 11927 | 0.051  | 0.012 | 17.5 | 2.90x10 <sup>-05</sup> | 6.56x10 <sup>-09</sup> |
| RS9268880  | 6 | 32431358 | C | A | 11905 | 0.053  | 0.012 | 18.3 | 1.91x10 <sup>-05</sup> | 2.08x10 <sup>-09</sup> |
| RS2395185  | 6 | 32433167 | C | A | 11926 | -0.081 | 0.014 | 33.9 | 5.88x10 <sup>-09</sup> | 1.90x10 <sup>-12</sup> |
| RS9268979  | 6 | 32435044 | G | A | 11825 | 0.050  | 0.012 | 17.2 | 3.45x10 <sup>-05</sup> | 8.70x10 <sup>-09</sup> |
| RS9368726  | 6 | 32438542 | A | G | 11882 | -0.080 | 0.014 | 33.5 | 6.97x10 <sup>-09</sup> | 2.62x10 <sup>-12</sup> |
| RS9405108  | 6 | 32438648 | G | A | 11928 | -0.080 | 0.014 | 33.5 | 6.96x10 <sup>-09</sup> | 2.22x10 <sup>-12</sup> |
| RS9286790  | 6 | 32439828 | G | A | 11933 | -0.081 | 0.014 | 34.2 | 5.07x10 <sup>-09</sup> | 1.61x10 <sup>-12</sup> |
| RS1964995  | 6 | 32449411 | A | G | 11923 | -0.065 | 0.012 | 26.9 | 2.13x10 <sup>-07</sup> | 2.12x10 <sup>-10</sup> |
| RS28366298 | 6 | 32560859 | A | C | 11885 | -0.081 | 0.014 | 33.5 | 7.04x10 <sup>-09</sup> | 2.29x10 <sup>-12</sup> |
| RS35265698 | 6 | 32561334 | C | G | 11795 | -0.095 | 0.016 | 34.0 | 5.61x10 <sup>-09</sup> | 3.02x10 <sup>-11</sup> |
| RS477515   | 6 | 32569691 | G | A | 11871 | -0.090 | 0.014 | 40.7 | 1.82x10 <sup>-10</sup> | 2.44x10 <sup>-14</sup> |
| RS2516049  | 6 | 32570400 | A | G | 11920 | -0.092 | 0.014 | 42.6 | 6.59x10 <sup>-11</sup> | 7.30x10 <sup>-15</sup> |
| RS602457   | 6 | 32573562 | A | G | 11935 | -0.093 | 0.016 | 33.3 | 8.01x10 <sup>-09</sup> | 2.51x10 <sup>-11</sup> |
| RS660895   | 6 | 32577380 | A | G | 11936 | -0.093 | 0.015 | 40.1 | 2.44x10 <sup>-10</sup> | 5.26x10 <sup>-13</sup> |
| RS532098   | 6 | 32578052 | G | A | 11928 | -0.052 | 0.012 | 18.1 | 2.13x10 <sup>-05</sup> | 1.10x10 <sup>-07</sup> |
| RS9271488  | 6 | 32589000 | C | A | 11908 | -0.078 | 0.014 | 31.3 | 2.24x10 <sup>-08</sup> | 9.03x10 <sup>-12</sup> |
| RS9271588  | 6 | 32590953 | A | G | 11898 | -0.058 | 0.012 | 22.5 | 2.07x10 <sup>-06</sup> | 4.74x10 <sup>-09</sup> |
| RS17843604 | 6 | 32620283 | G | A | 11873 | -0.059 | 0.012 | 23.3 | 1.36x10 <sup>-06</sup> | 3.56x10 <sup>-10</sup> |
| RS9273349  | 6 | 32625869 | A | G | 11933 | -0.070 | 0.012 | 32.5 | 1.16x10 <sup>-08</sup> | 4.11x10 <sup>-13</sup> |
| RS6928482  | 6 | 32626249 | A | G | 11886 | -0.063 | 0.013 | 25.1 | 5.51x10 <sup>-07</sup> | 1.17x10 <sup>-08</sup> |
| RS1063355  | 6 | 32627714 | A | C | 11924 | -0.070 | 0.012 | 33.1 | 8.95x10 <sup>-09</sup> | 2.75x10 <sup>-13</sup> |
| RS9273448  | 6 | 32627747 | G | A | 11932 | 0.062  | 0.012 | 24.6 | 7.16x10 <sup>-07</sup> | 1.03x10 <sup>-10</sup> |
| RS2647025  | 6 | 32635949 | G | A | 11927 | -0.069 | 0.014 | 25.0 | 5.75x10 <sup>-07</sup> | 2.35x10 <sup>-09</sup> |
| RS9274741  | 6 | 32637994 | A | G | 11830 | -0.051 | 0.012 | 17.0 | 3.66x10 <sup>-05</sup> | 3.34x10 <sup>-06</sup> |
| RS9275141  | 6 | 32651117 | A | C | 11897 | -0.063 | 0.013 | 25.6 | 4.28x10 <sup>-07</sup> | 1.39x10 <sup>-08</sup> |
| RS2856695  | 6 | 32651894 | A | G | 11931 | -0.064 | 0.013 | 26.1 | 3.19x10 <sup>-07</sup> | 1.04x10 <sup>-08</sup> |
| RS3021058  | 6 | 32652359 | A | C | 11922 | -0.064 | 0.013 | 26.0 | 3.42x10 <sup>-07</sup> | 1.06x10 <sup>-08</sup> |
| RS4947342  | 6 | 32653070 | G | A | 11906 | -0.083 | 0.014 | 33.1 | 8.85x10 <sup>-09</sup> | 2.86x10 <sup>-11</sup> |
| RS2856692  | 6 | 32653385 | A | C | 11886 | -0.082 | 0.014 | 32.1 | 1.43x10 <sup>-08</sup> | 4.98x10 <sup>-11</sup> |
| RS4642516  | 6 | 32657543 | C | A | 11929 | -0.064 | 0.013 | 26.2 | 3.09x10 <sup>-07</sup> | 9.87x10 <sup>-09</sup> |
| RS7774434  | 6 | 32657578 | A | G | 11934 | -0.052 | 0.013 | 16.9 | 3.91x10 <sup>-05</sup> | 9.91x10 <sup>-07</sup> |
| RS2858324  | 6 | 32660375 | A | G | 11918 | -0.058 | 0.012 | 23.7 | 1.14x10 <sup>-06</sup> | 3.54x10 <sup>-08</sup> |
| RS5000634  | 6 | 32663564 | A | G | 11906 | -0.058 | 0.013 | 20.1 | 7.20x10 <sup>-06</sup> | 2.08x10 <sup>-06</sup> |
| RS6457617  | 6 | 32663851 | G | A | 11921 | -0.050 | 0.012 | 17.3 | 3.11x10 <sup>-05</sup> | 6.73x10 <sup>-06</sup> |

|            |    |           |   |   |       |        |       |      |                        |                        |
|------------|----|-----------|---|---|-------|--------|-------|------|------------------------|------------------------|
| RS6457622  | 6  | 32664163  | A | C | 11923 | -0.058 | 0.013 | 20.0 | 7.81x10 <sup>-06</sup> | 2.09x10 <sup>-06</sup> |
| RS2647012  | 6  | 32664458  | A | G | 11932 | -0.057 | 0.012 | 23.0 | 1.60x10 <sup>-06</sup> | 4.86x10 <sup>-08</sup> |
| RS2647003  | 6  | 32664880  | A | C | 11931 | -0.057 | 0.012 | 23.0 | 1.61x10 <sup>-06</sup> | 5.06x10 <sup>-08</sup> |
| RS9275312  | 6  | 32665728  | A | G | 11923 | -0.074 | 0.016 | 22.1 | 2.58x10 <sup>-06</sup> | 1.32x10 <sup>-07</sup> |
| RS2856725  | 6  | 32666738  | G | A | 11930 | -0.057 | 0.012 | 23.0 | 1.65x10 <sup>-06</sup> | 4.98x10 <sup>-08</sup> |
| RS9275328  | 6  | 32666822  | G | A | 11929 | -0.072 | 0.016 | 21.1 | 4.27x10 <sup>-06</sup> | 2.45x10 <sup>-07</sup> |
| RS9275330  | 6  | 32666875  | A | G | 11914 | -0.071 | 0.016 | 20.6 | 5.68x10 <sup>-06</sup> | 3.18x10 <sup>-07</sup> |
| RS9275333  | 6  | 32666968  | A | G | 11931 | -0.073 | 0.016 | 21.3 | 4.02x10 <sup>-06</sup> | 2.23x10 <sup>-07</sup> |
| RS3135006  | 6  | 32667119  | G | A | 11862 | 0.061  | 0.012 | 23.8 | 1.05x10 <sup>-06</sup> | 1.62x10 <sup>-10</sup> |
| RS9275371  | 6  | 32668296  | A | G | 11919 | -0.052 | 0.013 | 15.2 | 9.81x10 <sup>-05</sup> | 8.79x10 <sup>-06</sup> |
| RS1612904  | 6  | 32669018  | A | C | 11908 | 0.048  | 0.012 | 16.1 | 6.15x10 <sup>-05</sup> | 4.25x10 <sup>-06</sup> |
| RS2856717  | 6  | 32670308  | A | G | 11933 | -0.058 | 0.012 | 23.5 | 1.22x10 <sup>-06</sup> | 3.46x10 <sup>-08</sup> |
| RS2858305  | 6  | 32670464  | C | A | 11932 | -0.058 | 0.012 | 23.2 | 1.48x10 <sup>-06</sup> | 4.51x10 <sup>-08</sup> |
| RS4947344  | 6  | 32677846  | G | A | 11903 | 0.056  | 0.012 | 21.3 | 3.93x10 <sup>-06</sup> | 1.34x10 <sup>-09</sup> |
| RS7454108  | 6  | 32681483  | A | G | 11923 | -0.080 | 0.018 | 19.6 | 9.52x10 <sup>-06</sup> | 7.75x10 <sup>-07</sup> |
| RS3957146  | 6  | 32681530  | A | G | 11891 | -0.081 | 0.018 | 19.7 | 9.13x10 <sup>-06</sup> | 7.77x10 <sup>-07</sup> |
| RS9275596  | 6  | 32681631  | A | G | 11923 | 0.047  | 0.012 | 15.7 | 7.36x10 <sup>-05</sup> | 5.11x10 <sup>-06</sup> |
| RS3998159  | 6  | 32682019  | A | C | 11921 | -0.079 | 0.018 | 19.0 | 1.29x10 <sup>-05</sup> | 1.05x10 <sup>-06</sup> |
| RS3957148  | 6  | 32682137  | A | G | 11925 | -0.081 | 0.018 | 20.1 | 7.53x10 <sup>-06</sup> | 7.20x10 <sup>-07</sup> |
| RS13192583 | 6  | 43834027  | G | A | 11936 | -0.097 | 0.024 | 16.3 | 5.54x10 <sup>-05</sup> | 2.63x10 <sup>-05</sup> |
| RS9692521  | 7  | 124956491 | G | A | 11905 | 0.056  | 0.014 | 16.7 | 4.32x10 <sup>-05</sup> | 7.15x10 <sup>-05</sup> |
| RS6973477  | 7  | 124958806 | A | C | 11912 | 0.055  | 0.014 | 16.2 | 5.61x10 <sup>-05</sup> | 7.45x10 <sup>-05</sup> |
| RS7795867  | 7  | 124977736 | A | G | 11926 | 0.057  | 0.014 | 17.5 | 2.82x10 <sup>-05</sup> | 4.03x10 <sup>-05</sup> |
| RS4419802  | 8  | 57216066  | G | A | 11935 | -0.052 | 0.013 | 15.7 | 7.39x10 <sup>-05</sup> | 1.68x10 <sup>-05</sup> |
| RS6473170  | 8  | 80502285  | G | A | 11885 | 0.050  | 0.013 | 15.2 | 9.48x10 <sup>-05</sup> | 1.76x10 <sup>-04</sup> |
| RS10508855 | 10 | 37070799  | G | A | 11907 | 0.132  | 0.032 | 17.1 | 3.50x10 <sup>-05</sup> | 1.51x10 <sup>-05</sup> |
| RS12358208 | 10 | 123470963 | G | A | 11916 | 0.074  | 0.019 | 15.9 | 6.77x10 <sup>-05</sup> | 7.64x10 <sup>-05</sup> |
| RS638051   | 11 | 68141414  | A | G | 11905 | 0.048  | 0.012 | 15.3 | 9.35x10 <sup>-05</sup> | 1.58x10 <sup>-04</sup> |
| RS3740925  | 11 | 87847018  | A | G | 11913 | -0.081 | 0.020 | 16.4 | 5.02x10 <sup>-05</sup> | 6.57x10 <sup>-05</sup> |
| RS1943509  | 11 | 95319115  | G | A | 11904 | 0.058  | 0.014 | 16.9 | 4.03x10 <sup>-05</sup> | 1.95x10 <sup>-04</sup> |
| RS12582594 | 12 | 48810729  | G | A | 11929 | -0.062 | 0.015 | 16.7 | 4.46x10 <sup>-05</sup> | 2.89x10 <sup>-05</sup> |
| RS11616341 | 13 | 101721029 | A | G | 11931 | -0.054 | 0.013 | 16.6 | 4.54x10 <sup>-05</sup> | 4.72x10 <sup>-05</sup> |
| RS6574723  | 14 | 83306515  | G | A | 11927 | 0.064  | 0.014 | 20.5 | 6.09x10 <sup>-06</sup> | 4.28x10 <sup>-05</sup> |
| RS1024307  | 14 | 83308389  | G | A | 11918 | 0.064  | 0.014 | 20.5 | 6.09x10 <sup>-06</sup> | 4.26x10 <sup>-05</sup> |
| RS2046362  | 15 | 30936285  | G | A | 11880 | 0.046  | 0.012 | 15.4 | 8.89x10 <sup>-05</sup> | 5.13x10 <sup>-05</sup> |
| RS1437773  | 15 | 96997098  | A | G | 11920 | -0.052 | 0.013 | 16.1 | 5.98x10 <sup>-05</sup> | 8.29x10 <sup>-05</sup> |
| RS10500329 | 16 | 5894782   | G | A | 11900 | 0.054  | 0.012 | 19.4 | 1.07x10 <sup>-05</sup> | 8.51x10 <sup>-06</sup> |
| RS6500728  | 16 | 5900889   | G | A | 11932 | 0.051  | 0.013 | 15.8 | 7.00x10 <sup>-05</sup> | 1.02x10 <sup>-04</sup> |
| RS2343339  | 16 | 5919272   | G | A | 11932 | 0.051  | 0.012 | 17.0 | 3.68x10 <sup>-05</sup> | 3.32x10 <sup>-05</sup> |
| RS11150737 | 17 | 78641290  | A | G | 11919 | -0.053 | 0.013 | 16.7 | 4.45x10 <sup>-05</sup> | 4.58x10 <sup>-05</sup> |

|          |    |          |   |   |       |        |       |      |                        |                        |
|----------|----|----------|---|---|-------|--------|-------|------|------------------------|------------------------|
| RS13111  | 20 | 30922399 | G | A | 11901 | -0.080 | 0.019 | 17.4 | $3.10 \times 10^{-05}$ | $1.28 \times 10^{-05}$ |
| RS846215 | 20 | 59199927 | G | A | 11933 | 0.056  | 0.014 | 15.3 | $9.22 \times 10^{-05}$ | $5.43 \times 10^{-05}$ |
| RS525126 | 23 | 90557537 | A | C | 11903 | -0.043 | 0.011 | 16.0 | $6.39 \times 10^{-05}$ | $1.16 \times 10^{-04}$ |



**Table S5. HLA alleles associated with anti-ANO2 antibody levels**

| HLA allele                                                                  | ALL                  |               |                       |        |                      |                        | CASES  |                      |                        | CONTROLS |                      |                        |
|-----------------------------------------------------------------------------|----------------------|---------------|-----------------------|--------|----------------------|------------------------|--------|----------------------|------------------------|----------|----------------------|------------------------|
|                                                                             | Allele frequency (%) | OR (95%CI)    | OR P                  | beta * | P*                   | P (log <sub>10</sub> ) | beta * | P*                   | P (log <sub>10</sub> ) | beta *   | P*                   | P (log <sub>10</sub> ) |
| <b><i>B*15:01-DRB4*01:03-DRB1*04:[01/04]-DQA1*03:[01/02]-DQB1*03:02</i></b> |                      |               |                       |        |                      |                        |        |                      |                        |          |                      |                        |
| <i>B*15:01</i>                                                              | 20                   | 0.8 (0.7-0.9) | 2.2x10 <sup>-3</sup>  | -82    | 1.1x10 <sup>-2</sup> | 6.0x10 <sup>-3</sup>   | -153   | 5.4x10 <sup>-3</sup> | 3.7x10 <sup>-3</sup>   | -5       | 0.86                 | 0.52                   |
| <i>DRB4*01:03</i>                                                           | 38                   | 0.7 (0.6-0.8) | 5.2x10 <sup>-9</sup>  | -127   | 1.9x10 <sup>-6</sup> | 4.0x10 <sup>-12</sup>  | -165   | 3.3x10 <sup>-4</sup> | 5.3x10 <sup>-6</sup>   | -90      | 2.3x10 <sup>-4</sup> | 5.1x10 <sup>-5</sup>   |
| <i>DRB1*04:01</i>                                                           | 19                   | 0.6 (0.5-0.7) | 9.7x10 <sup>-11</sup> | -129   | 9.0x10 <sup>-5</sup> | 1.7x10 <sup>-11</sup>  | -190   | 1.2x10 <sup>-3</sup> | 4.6x10 <sup>-6</sup>   | -79      | 6.7x10 <sup>-3</sup> | 5.5x10 <sup>-5</sup>   |
| <i>DRB1*04:04</i>                                                           | 9                    | 0.8 (0.6-1.0) | 4.3x10 <sup>-2</sup>  | -102   | 2.6x10 <sup>-2</sup> | 8.1x10 <sup>-3</sup>   | -107   | 0.16                 | 5.1x10 <sup>-2</sup>   | -94      | 3.0x10 <sup>-2</sup> | 3.7x10 <sup>-2</sup>   |
| <i>DQA1*03:01</i>                                                           | 27                   | 0.7 (0.6-0.8) | 5.3x10 <sup>-6</sup>  | -111   | 1.4x10 <sup>-4</sup> | 4.9x10 <sup>-6</sup>   | -158   | 1.6x10 <sup>-3</sup> | 5.0x10 <sup>-4</sup>   | -65      | 1.5x10 <sup>-2</sup> | 1.0x10 <sup>-2</sup>   |
| <i>DQA1*03:02</i>                                                           | 8                    | 0.6 (0.4-0.7) | 2.0x10 <sup>-5</sup>  | -94    | 4.9x10 <sup>-2</sup> | 4.1x10 <sup>-6</sup>   | -119   | 0.20                 | 3.3x10 <sup>-3</sup>   | -81      | 3.9x10 <sup>-2</sup> | 1.1x10 <sup>-2</sup>   |
| <i>DQB1*03:02</i>                                                           | 25                   | 0.8 (0.7-0.9) | 5.7x10 <sup>-5</sup>  | -123   | 4.2x10 <sup>-5</sup> | 7.2x10 <sup>-6</sup>   | -177   | 5.7x10 <sup>-4</sup> | 2.6x10 <sup>-4</sup>   | -67      | 1.6x10 <sup>-2</sup> | 1.3x10 <sup>-2</sup>   |
| <b><i>A*32:01-DRB3*02:02-DRB1*12:01-DQA1*05:05</i></b>                      |                      |               |                       |        |                      |                        |        |                      |                        |          |                      |                        |
| <i>A*32:01</i>                                                              | 6                    | 1.2 (0.9-1.4) | 0.15                  | 80     | 0.14                 | 5.1x10 <sup>-3</sup>   | 109    | 0.23                 | 0.12                   | 46       | 0.36                 | 8.8x10 <sup>-3</sup>   |
| <i>DRB3*02:02</i>                                                           | 22                   | 1.2 (1.0-1.3) | 1.8x10 <sup>-2</sup>  | 105    | 9.1x10 <sup>-4</sup> | 3.0x10 <sup>-3</sup>   | 178    | 1.4x10 <sup>-3</sup> | 8.5x10 <sup>-3</sup>   | 42       | 0.14                 | 1.2x10 <sup>-3</sup>   |
| <i>DRB1*12:01</i>                                                           | 3                    | 1.5 (1.2-1.9) | 2.2x10 <sup>-3</sup>  | 314    | 1.9x10 <sup>-5</sup> | 4.6x10 <sup>-5</sup>   | 599    | 3.8x10 <sup>-5</sup> | 1.6x10 <sup>-3</sup>   | 148      | 1.3x10 <sup>-2</sup> | 6.0x10 <sup>-5</sup>   |
| <i>DQA1*05:05**</i>                                                         | 12                   | 1.2 (1.0-1.4) | 1.4x10 <sup>-2</sup>  | 166    | 2.8x10 <sup>-5</sup> | 4.1x10 <sup>-2</sup>   | 320    | 4.0x10 <sup>-6</sup> | 3.9x10 <sup>-2</sup>   | 22       | 0.54                 | 8.9x10 <sup>-2</sup>   |
| <b><i>B*07:02-DRB5*01:01-DRB1*15:01-DQA1*01:02-DQB*06:02</i></b>            |                      |               |                       |        |                      |                        |        |                      |                        |          |                      |                        |
| <i>B*07:02</i>                                                              | 34                   | 1.2 (1.0-1.3) | 6.6x10 <sup>-3</sup>  | 20     | 0.47                 | 1.2x10 <sup>-4</sup>   | 29     | 0.52                 | 2.9x10 <sup>-2</sup>   | 12       | 0.65                 | 0.12                   |
| <i>DRB5*01:01</i>                                                           | 45                   | 1.3 (1.1-1.4) | 5.4x10 <sup>-5</sup>  | -4     | 0.87                 | 7.7x10 <sup>-9</sup>   | 1      | 0.98                 | 6.7x10 <sup>-3</sup>   | -14      | 0.60                 | 0.32                   |
| <i>DRB1*15:01</i>                                                           | 45                   | 1.3 (1.1-1.4) | 7.8x10 <sup>-5</sup>  | -6     | 0.82                 | 2.0x10 <sup>-8</sup>   | -2     | 0.97                 | 9.7x10 <sup>-3</sup>   | -14      | 0.60                 | 0.36                   |
| <i>DQA1*01:02</i>                                                           | 52                   | 1.2 (1.1-1.4) | 1.3x10 <sup>-4</sup>  | 9      | 0.74                 | 1.9x10 <sup>-8</sup>   | 22     | 0.64                 | 6.8x10 <sup>-3</sup>   | -7       | 0.77                 | 9.9x10 <sup>-2</sup>   |
| <i>DQB1*06:02</i>                                                           | 44                   | 1.3 (1.1-1.4) | 2.1x10 <sup>-5</sup>  | -1     | 0.96                 | 3.4x10 <sup>-8</sup>   | -1     | 0.99                 | 1.6x10 <sup>-2</sup>   | -6       | 0.82                 | 0.31                   |
| <b><i>Other</i></b>                                                         |                      |               |                       |        |                      |                        |        |                      |                        |          |                      |                        |
| <i>DQB1*06:09</i>                                                           | 1                    | 1.8 (1.2-2.5) | 3.4x10 <sup>-3</sup>  | 382    | 4.1x10 <sup>-4</sup> | 7.8x10 <sup>-4</sup>   | 426    | 9.9x10 <sup>-3</sup> | 9.1x10 <sup>-3</sup>   | 287      | 1.4x10 <sup>-2</sup> | 0.14                   |

Note: Alleles included are associated at significance level  $\alpha=0.01$  in all individuals ( $n = 13\ 160$ ) with  $\log_{10}$  transformed anti-ANO2 signal intensities. All results were based on carrier association adjusted for MS (in all), age, study type, EBNA1-status, sex, and PCA1-5.

\*not  $\log_{10}$  transformed, \*\* included in the table due to its presence on the associated haplotype

HLA haplotype references: (28-31) and <http://www.allelefrequencies.net>

**Table S6. ANO2 [aa 1-365] autoantibody reactivity association with disease.**

| Cohort            | Controls<br>N | Cases<br>N | beta | p                    | p (log <sub>10</sub> ) | beta* | p*                   | P<br>(log <sub>10</sub> )* |
|-------------------|---------------|------------|------|----------------------|------------------------|-------|----------------------|----------------------------|
| <b>Initial</b>    | 1 058         | 1 040      | 133  | 4.5x10 <sup>-9</sup> | 1.0x10 <sup>-17</sup>  | 127   | 6.8x10 <sup>-8</sup> | 5.5x10 <sup>-12</sup>      |
| <b>Validation</b> | 6 170         | 7 603      | 37   | 4.0x10 <sup>-5</sup> | 6.1x10 <sup>-4</sup>   | 23    | 1.4x10 <sup>-2</sup> | 1.9x10 <sup>-12</sup>      |
| <b>Whole</b>      | 7 228         | 8 746      | 49   | 4.4x10 <sup>-9</sup> | 0.94                   | 36    | 3.3x10 <sup>-5</sup> | 4.6x10 <sup>-5</sup>       |
| <b>Pre-MS</b>     | 478           | 476        | -15  | 0.45                 | 2.1x10 <sup>-2</sup>   | -31   | 0.12                 | 0.28                       |
| <b>RA</b>         | 986           | 689        | -22  | 0.21                 | 0.41                   | -22   | 0.19                 | 0.48                       |

Association analyses are adjusted for age and sex. Analyses were also adjusted for study type for the Validation and Whole cohorts. \*Adjusted also for EBNA1-status.

MS=Multiple sclerosis, RA= Rheumatoid arthritis.

**Table S7. Demographic data of the Initial, Validation, and Whole cohorts.**

| Sample cohort     | No. of Subjects | Female% | Median age, yrs | Range, yrs |
|-------------------|-----------------|---------|-----------------|------------|
| <b>Initial</b>    |                 |         |                 |            |
| RRMS*             | 924             | 75      | 36              | 16-71      |
| SPMS†             | 59              | 61      | 48              | 22-66      |
| PPMS†             | 29              | 59      | 54              | 36-76      |
| PRMS/RPMS†        | 7               | 43      | 45              | 33-55      |
| <i>COURSE NA</i>  | 8               | 75      | 47              | 27-65      |
| MS                | 1 040           | 74      | 37              | 16-76      |
| Control           | 1 058           | 76      | 40              | 18-70      |
| <b>Total</b>      | 2 098           |         |                 |            |
| <b>Validation</b> |                 |         |                 |            |
| RRMS*             | 4 594           | 74      | 42 (1 NA)       | 13-88      |
| SPMS†             | 1 724           | 71      | 59              | 19-87      |
| PPMS†             | 515             | 56      | 61.0            | 20-86      |
| PRMS/RPMS†        | 127             | 69      | 51              | 20-84      |
| <i>COURSE NA</i>  | 634             | 70      | 58              | 17-87      |
| MS                | 7 604           | 72      | 48 (1 NA)       | 13-88      |
| Control           | 6 170           | 75      | 49              | 16-89      |
| <b>Total</b>      | 13 774          |         |                 |            |
| <b>Whole</b>      |                 |         |                 |            |
| RRMS*             | 5 589           | 74      | 41 (1 NA)       | 13-88      |
| SPMS†             | 1 804           | 71      | 58              | 19-87      |
| PPMS†             | 549             | 56      | 61              | 20-86      |
| PRMS/RPMS†        | 134             | 67      | 51              | 20-84      |
| <i>COURSE NA</i>  | 642             | 74      | 58              | 17-87      |
| MS                | 8 746           | 72      | 47 (1 NA)       | 13-88      |
| Control           | 7 228           | 75      | 48              | 16-89      |
| <b>Total</b>      | 15 974          |         |                 |            |

*PPMS, primary progressive MS; PRMS, progressive relapsing MS; RPMS, relapsing progressive MS; RRMS, relapsing remitting MS; SPMS, secondary progressive MS.*

*\*The CIS-conv and RRMS groups are categorized as “relapsing-remitting MS.”*

*†The SPMS, PPMS, RPMS and PRMS groups are categorized as “progressive MS.”*

## References

1. Olafsson S, *et al.* (2017) Fourteen sequence variants that associate with multiple sclerosis discovered by meta-analysis informed by genetic correlations. *NPJ Genom Med* 2:24.
2. International Multiple Sclerosis Genetics Consortium P, N., Baranzini, S.E., Santaniello, A., Shoostari, P., Cotsapas, C., Wong, G., Beecham, A.H., James, T., Replogle, J., *et al.* (2017) The Multiple Sclerosis Genomic Map: Role of peripheral immune cells and resident microglia in susceptibility. *bioRxiv* <https://doi.org/10.1101/143933>.
3. Patterson N, Price AL, & Reich D (2006) Population structure and eigenanalysis. *PLoS Genet* 2(12):e190.
4. Purcell S, *et al.* (2007) PLINK: a tool set for whole-genome association and population-based linkage analyses. *Am J Hum Genet* 81(3):559-575.
5. Aulchenko YS, Ripke S, Isaacs A, & van Duijn CM (2007) GenABEL: an R library for genome-wide association analysis. *Bioinformatics* 23(10):1294-1296.
6. Rönnegård L, Shen X, & Alam M (2010) hglm: A package for fitting hierarchical generalized linear models. *The R Journal* 2:20-28.
7. Kierczak M, *et al.* (2015) cgmisc: enhanced genome-wide association analyses and visualization. *Bioinformatics* 31(23):3830-3831.
8. Barsh GS, Copenhaver GP, Gibson G, & Williams SM (2012) Guidelines for genome-wide association studies. *PLoS Genet* 8(7):e1002812.
9. Patsopoulos N (2016) PgmNr 4: 200 loci complete the genetic puzzle of multiple sclerosis. in *the American Society of Human Genetics 2016 Annual Meeting* (Vancouver, B.C., Canada.).
10. Dilthey A, *et al.* (2013) Multi-population classical HLA type imputation. *PLoS Comput Biol* 9(2):e1002877.
11. Jia X, *et al.* (2013) Imputing amino acid polymorphisms in human leukocyte antigens. *PLoS One* 8(6):e64683.
12. Hedstrom AK, Baarnhielm M, Olsson T, & Alfredsson L (2009) Tobacco smoking, but not Swedish snuff use, increases the risk of multiple sclerosis. *Neurology* 73(9):696-701.
13. Hedstrom AK, Akerstedt T, Hillert J, Olsson T, & Alfredsson L (2011) Shift work at young age is associated with increased risk for multiple sclerosis. *Ann Neurol* 70(5):733-741.
14. Holmen C, *et al.* (2011) A Swedish national post-marketing surveillance study of natalizumab treatment in multiple sclerosis. *Mult Scler* 17(6):708-719.
15. Khademi M, *et al.* (2011) Cerebrospinal fluid CXCL13 in multiple sclerosis: a suggestive prognostic marker for the disease course. *Mult Scler* 17(3):335-343.
16. McDonald WI, *et al.* (2001) Recommended diagnostic criteria for multiple sclerosis: guidelines from the International Panel on the diagnosis of multiple sclerosis. *Ann Neurol* 50(1):121-127.
17. Polman CH, *et al.* (2011) Diagnostic criteria for multiple sclerosis: 2010 revisions to the McDonald criteria. *Ann Neurol* 69(2):292-302.
18. Ayoglu B, *et al.* (2016) Anoctamin 2 identified as an autoimmune target in multiple sclerosis. *Proceedings of the National Academy of Sciences of the United States of America* 113(8):2188-2193.
19. Ayoglu B, *et al.* (2013) Autoantibody profiling in multiple sclerosis using arrays of human protein fragments. *Mol Cell Proteomics* 12(9):2657-2672.

20. Stolt P, *et al.* (2003) Quantification of the influence of cigarette smoking on rheumatoid arthritis: results from a population based case-control study, using incident cases. *Ann Rheum Dis* 62(9):835-841.
21. Haggmark A, *et al.* (2015) Proteomic profiling reveals autoimmune targets in sarcoidosis. *Am J Respir Crit Care Med* 191(5):574-583.
22. Idborg H, *et al.* (2018) TNF-alpha and plasma albumin as biomarkers of disease activity in systemic lupus erythematosus. *Lupus Sci Med* 5(1):e000260.
23. Waterboer T, *et al.* (2005) Multiplex human papillomavirus serology based on in situ-purified glutathione s-transferase fusion proteins. *Clin Chem* 51(10):1845-1853.
24. Sehr P, Zumbach K, & Pawlita M (2001) A generic capture ELISA for recombinant proteins fused to glutathione S-transferase: validation for HPV serology. *J Immunol Methods* 253(1-2):153-162.
25. Sundqvist E, *et al.* (2012) Epstein-Barr virus and multiple sclerosis: interaction with HLA. *Genes Immun* 13(1):14-20.
26. Team RC (2014) R: A language and environment for statistical computing. *R Foundation for Statistical Computing, Vienna, Austria.*
27. Kallberg H, Ahlbom A, & Alfredsson L (2006) Calculating measures of biological interaction using R. *Eur J Epidemiol* 21(8):571-573.
28. Farh KK, *et al.* (2015) Genetic and epigenetic fine mapping of causal autoimmune disease variants. *Nature* 518(7539):337-343.
29. Patsopoulos NA, *et al.* (2013) Fine-mapping the genetic association of the major histocompatibility complex in multiple sclerosis: HLA and non-HLA effects. *PLoS Genet* 9(11):e1003926.
30. Erlich HA, *et al.* (2013) Next generation sequencing reveals the association of DRB3\*02:02 with type 1 diabetes. *Diabetes* 62(7):2618-2622.
31. Maiers M, Gragert L, & Klitz W (2007) High-resolution HLA alleles and haplotypes in the United States population. *Hum Immunol* 68(9):779-788.
